# Supplementary material for: Halo- and Thiocarbazomycins from Coral- and Coral Reef Sands-Derived Actinomycetes
Source: MDPI journal article supplement (doi:10.3390/md20080537), 2022-08-21
Supplement: s1 [file s1]

## Supporting information

### Halo- and Thiocarbazomycins from Coral- and Coral Reef Sands-Derived *Actinomycetes*

Qiaoling Wu<sup>1,2</sup>, Hongjie Zhu<sup>4</sup>, Changli Sun<sup>1,3</sup>, Le Zhou<sup>1</sup>, Huimin Wang<sup>5</sup>, Songbiao Shi<sup>1,2</sup>, Xinpeng Tian<sup>1</sup> and Jianhua Ju<sup>1,2,3,\*</sup>

<sup>1</sup> CAS Key Laboratory of Tropical Marine Bio-resources and Ecology, RNAM Center for Marine Microbiology, Guangdong Key Laboratory of Marine Materia Medica, South China Sea Institute of Oceanology, Chinese Academy of Sciences, Guangzhou, Guangdong 510301, China

<sup>2</sup> University of Chinese Academy of Sciences, Beijing 110039, China

<sup>3</sup> Southern Marine Science and Engineering Guangdong Laboratory, Guangzhou, Guangdong 511458, China

<sup>4</sup> School of Pharmaceutical Sciences, Shandong University, Jinan 2500012, Shandong, China

<sup>5</sup> School of Pharmacy, Institute of Marine Drug, Guangxi University of Traditional Chinese Medicine, Nanning 530200, China

\* Correspondence: jjju@scsio.ac.cn ; Tel.: +86-20-8902-3028

### Contents

|                                                                                                             |    |
|-------------------------------------------------------------------------------------------------------------|----|
| 1. NMR spectra of compounds 1-7.                                                                            | 3  |
| Figure S1. <sup>1</sup> H-NMR spectrum of compound 1 in methanol- <i>d</i> <sub>4</sub> .                   | 3  |
| Figure S2. <sup>1</sup> H-NMR spectrum of compound 1 in DMSO- <i>d</i> <sub>6</sub> .                       | 4  |
| Figure S3. <sup>13</sup> C-NMR spectrum of compound 1 in methanol- <i>d</i> <sub>4</sub> .                  | 4  |
| Figure S4. <sup>13</sup> C-NMR spectrum of compound 1 in DMSO- <i>d</i> <sub>6</sub> .                      | 5  |
| Figure S5. DEPT135 spectrum of compound 1 in methanol- <i>d</i> <sub>4</sub> .                              | 5  |
| Figure S6. HSQC spectrum of compound 1 in methanol- <i>d</i> <sub>4</sub> .                                 | 6  |
| Figure S7. HSQC spectrum of compound 1 in DMSO- <i>d</i> <sub>6</sub> .                                     | 6  |
| Figure S8. <sup>1</sup> H- <sup>1</sup> H COSY spectrum of compound 1 in methanol- <i>d</i> <sub>4</sub> .  | 7  |
| Figure S9. HMBC spectrum of compound 1 in methanol- <i>d</i> <sub>4</sub> .                                 | 7  |
| Figure S10. HMBC spectrum of compound 1 in DMSO- <i>d</i> <sub>6</sub> .                                    | 7  |
| Figure S11. HRESIMS of compound 1.                                                                          | 8  |
| Figure S12. UV spectrum of compound 1.                                                                      | 9  |
| Figure S13. <sup>1</sup> H-NMR spectrum of compound 2 in methanol- <i>d</i> <sub>4</sub> .                  | 10 |
| Figure S14. <sup>1</sup> H-NMR spectrum of compound 2 in DMSO- <i>d</i> <sub>6</sub> .                      | 10 |
| Figure S15. <sup>13</sup> C-NMR spectrum of compound 2 in methanol- <i>d</i> <sub>4</sub> .                 | 11 |
| Figure S16. <sup>13</sup> C-NMR spectrum of compound 2 in DMSO- <i>d</i> <sub>6</sub> .                     | 11 |
| Figure S17. DEPT135 spectrum of compound 2 in methanol- <i>d</i> <sub>4</sub> .                             | 12 |
| Figure S18. HSQC spectrum of compound 2 in methanol- <i>d</i> <sub>4</sub> .                                | 12 |
| Figure S19. HSQC spectrum of compound 2 in DMSO- <i>d</i> <sub>6</sub> .                                    | 13 |
| Figure S20. <sup>1</sup> H- <sup>1</sup> H COSY spectrum of compound 2 in methanol- <i>d</i> <sub>4</sub> . | 13 |
| Figure S21. HMBC spectrum of compound 2 in methanol- <i>d</i> <sub>4</sub> .                                | 14 |

|                                                                                                             |    |
|-------------------------------------------------------------------------------------------------------------|----|
| Figure S22. HMBC spectrum of compound 2 in DMSO- <i>d</i> <sub>6</sub> .                                    | 14 |
| Figure S23. HRESIMS of compound 2.                                                                          | 15 |
| Figure S24. UV spectrum of compound 2.                                                                      | 16 |
| Figure S25. <sup>1</sup> H-NMR spectrum of compound 3 in methanol- <i>d</i> <sub>4</sub> .                  | 17 |
| Figure S26. <sup>13</sup> C-NMR spectrum of compound 3 in methanol- <i>d</i> <sub>4</sub> .                 | 18 |
| Figure S27. DEPT135 spectrum of compound 3 in methanol- <i>d</i> <sub>4</sub> .                             | 18 |
| Figure S28. HSQC spectrum of compound 3 in methanol- <i>d</i> <sub>4</sub> .                                | 19 |
| Figure S29. <sup>1</sup> H- <sup>1</sup> H COSY spectrum of compound 3 in methanol- <i>d</i> <sub>4</sub> . | 19 |
| Figure S30. HMBC spectrum of compound 3 in methanol- <i>d</i> <sub>4</sub> .                                | 19 |
| Figure S31. HRESIMS of compound 3.                                                                          | 20 |
| Figure S32. UV spectrum of compound 3.                                                                      | 21 |
| Figure S33. <sup>1</sup> H-NMR spectrum of compound 4 in chloroform- <i>d</i> .                             | 22 |
| Figure S34. <sup>13</sup> C-NMR spectrum of compound 4 in chloroform- <i>d</i> .                            | 22 |
| Figure S35. DEPT135 spectrum of compound 4 in chloroform- <i>d</i> .                                        | 23 |
| Figure S36. HSQC spectrum of compound 4 in chloroform- <i>d</i> .                                           | 23 |
| Figure S37. <sup>1</sup> H- <sup>1</sup> H COSY spectrum of compound 4 in chloroform- <i>d</i> .            | 24 |
| Figure S38. HMBC spectrum of compound 4 in chloroform- <i>d</i> .                                           | 24 |
| Figure S39. HRESIMS of compound 4.                                                                          | 25 |
| Figure S40. UV spectrum of compound 4.                                                                      | 26 |
| Figure S41. <sup>1</sup> H-NMR spectrum of compound 5 in chloroform- <i>d</i> .                             | 27 |
| Figure S42. <sup>13</sup> C-NMR spectrum of compound 5 in chloroform- <i>d</i> .                            | 27 |
| Figure S43. DEPT135 spectrum of compound 5 in chloroform- <i>d</i> .                                        | 28 |
| Figure S44. HSQC spectrum of compound 5 in chloroform- <i>d</i> .                                           | 28 |
| Figure S45. <sup>1</sup> H- <sup>1</sup> H COSY spectrum of compound 5 in chloroform- <i>d</i> .            | 29 |
| Figure S46. HMBC spectrum of compound 5 in chloroform- <i>d</i> .                                           | 29 |
| Figure S47. HRESIMS of compound 5.                                                                          | 30 |
| Figure S48. <sup>1</sup> H-NMR spectrum of compound 6 in methanol- <i>d</i> <sub>4</sub> .                  | 30 |
| Figure S49. <sup>13</sup> C-NMR spectrum of compound 6 in methanol- <i>d</i> <sub>4</sub> .                 | 31 |
| Figure S50. DEPT135 spectrum of compound 6 in methanol- <i>d</i> <sub>4</sub> .                             | 31 |
| Figure S51. HSQC spectrum of compound 6 in methanol- <i>d</i> <sub>4</sub> .                                | 32 |
| Figure S52. <sup>1</sup> H- <sup>1</sup> H COSY spectrum of compound 6 in methanol- <i>d</i> <sub>4</sub> . | 32 |
| Figure S53. HMBC spectrum of compound 6 in methanol- <i>d</i> <sub>4</sub> .                                | 33 |
| Figure S54. HRESIMS of compound 6.                                                                          | 33 |
| Figure S55. <sup>1</sup> H-NMR spectrum of compound 7 in methanol- <i>d</i> <sub>4</sub> .                  | 34 |
| Figure S56. <sup>13</sup> C-NMR spectrum of compound 7 in methanol- <i>d</i> <sub>4</sub> .                 | 34 |
| Figure S57. DEPT135 spectrum of compound 7 in methanol- <i>d</i> <sub>4</sub> .                             | 35 |
| Figure S58. HSQC spectrum of compound 7 in methanol- <i>d</i> <sub>4</sub> .                                | 35 |
| Figure S59. <sup>1</sup> H- <sup>1</sup> H COSY spectrum of compound 7 in methanol- <i>d</i> <sub>4</sub> . | 36 |
| Figure S60. HMBC spectrum of compound 7 in methanol- <i>d</i> <sub>4</sub> .                                | 36 |
| Figure S61. HRESIMS of compound 7.                                                                          | 37 |
| 2. Medium Formula and Optimization Results of <i>S. diacarni</i> SCSIO 64983                                | 37 |
| Figure S62. Optimization Results of <i>S. diacarni</i> SCSIO 64983                                          | 38 |

3. NMR data of 6-7 in methanol- $d_4$  and 1-2 in DMSO- $d_6$  38

## 1. NMR spectra of compounds 1-7.

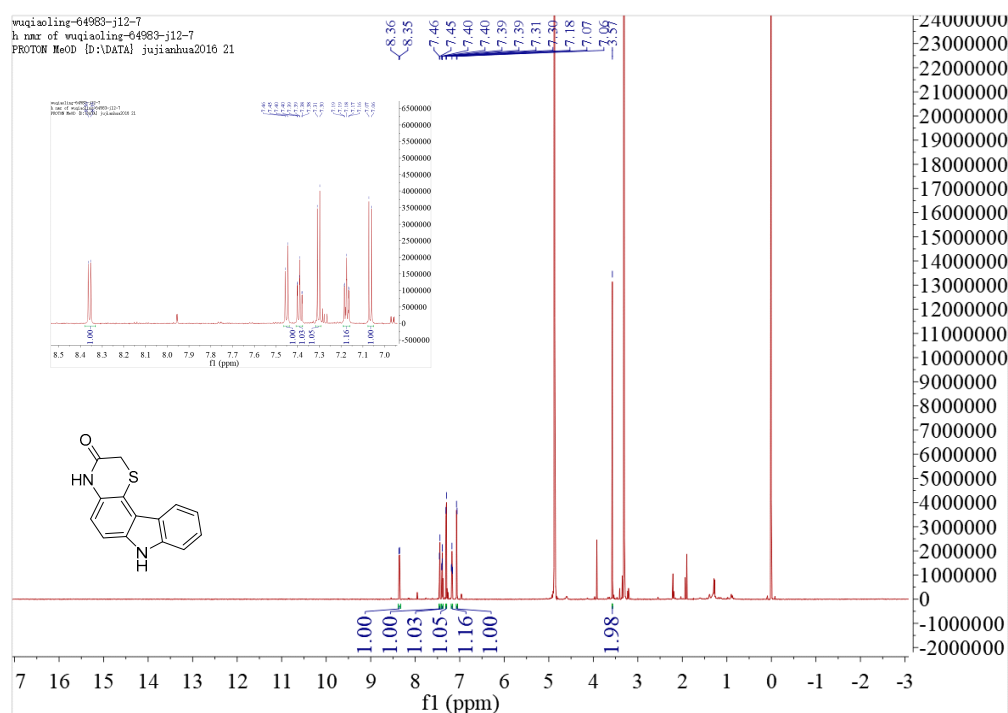Figure S1.  $^1\text{H}$ -NMR spectrum of compound 1 in mathanol- $d_4$ .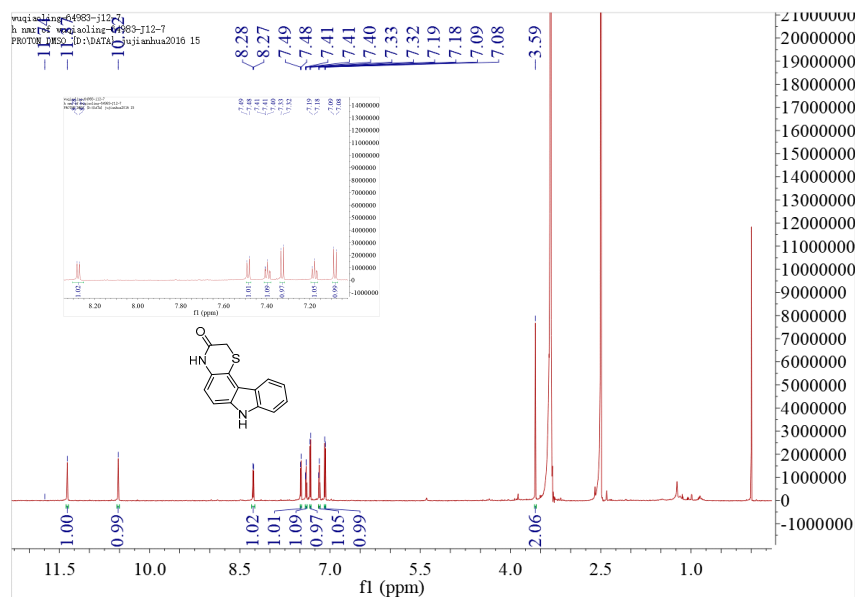

**Figure S2.**  $^1\text{H}$ -NMR spectrum of compound **1** in  $\text{DMSO}-d_6$ .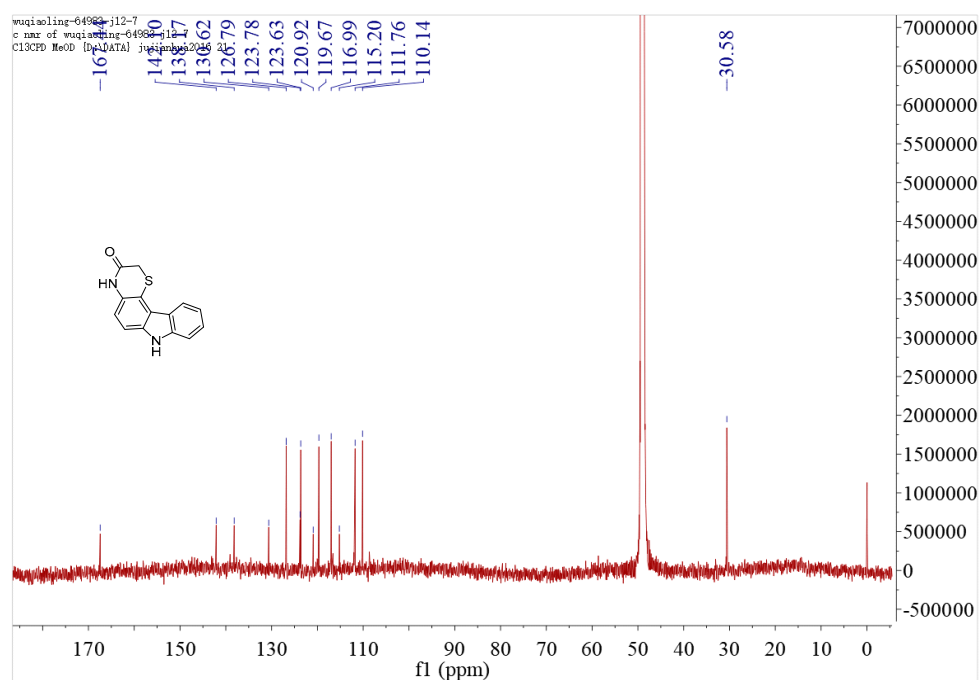**Figure S3.**  $^{13}\text{C}$ -NMR spectrum of compound **1** in methanol- $d_4$ .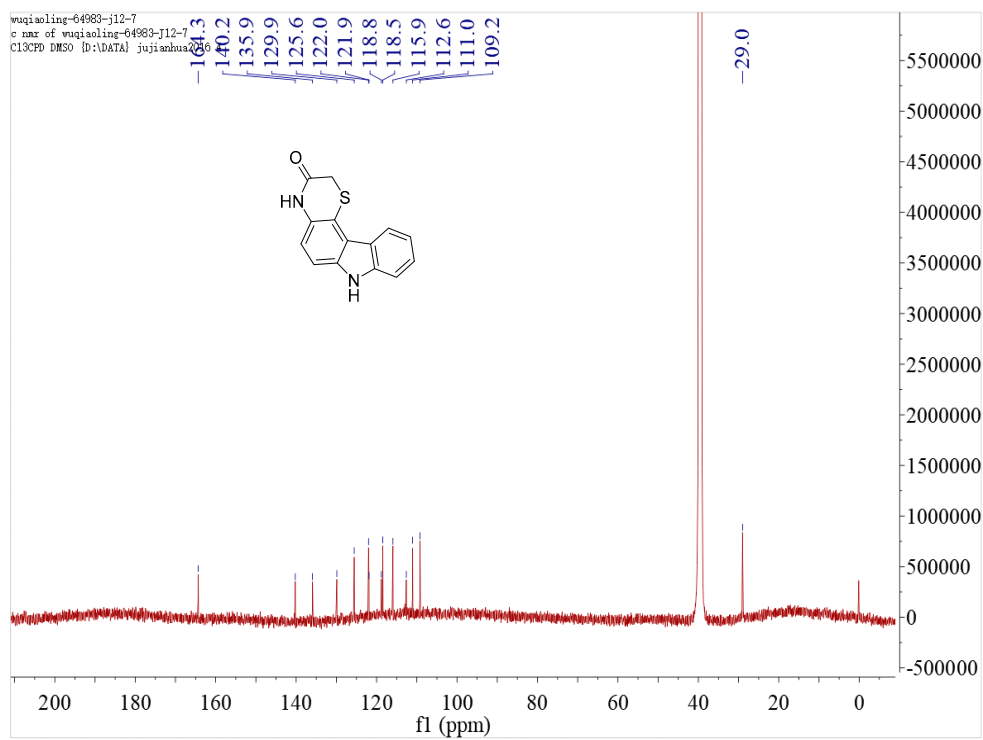

**Figure S4.**  $^{13}\text{C}$ -NMR spectrum of compound **1** in  $\text{DMSO}-d_6$ .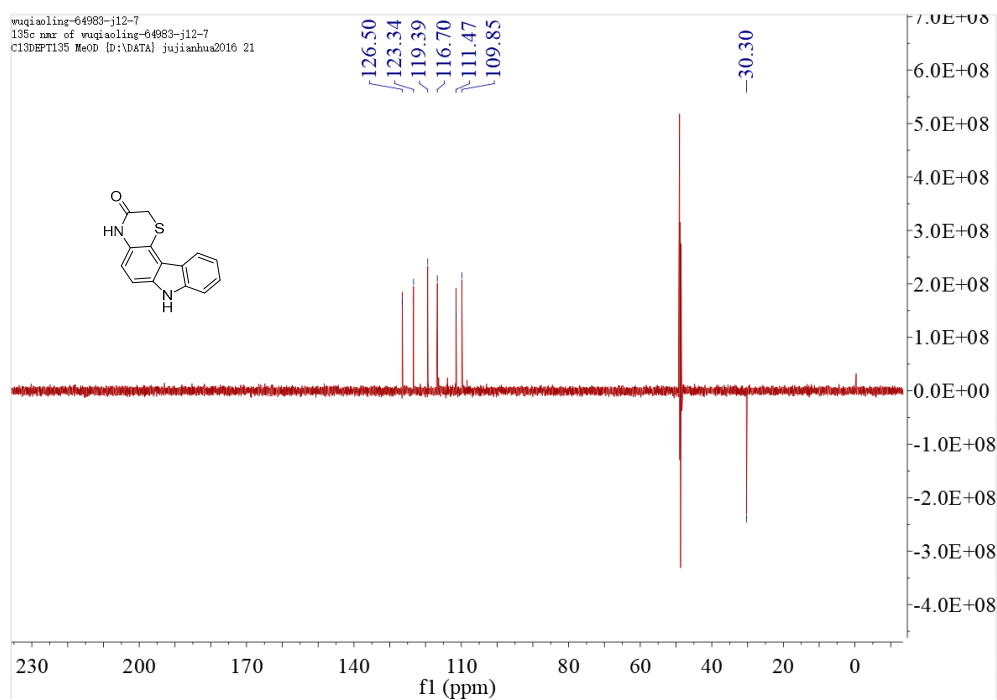**Figure S5.** DEPT135 spectrum of compound **1** in methanol- $d_4$ .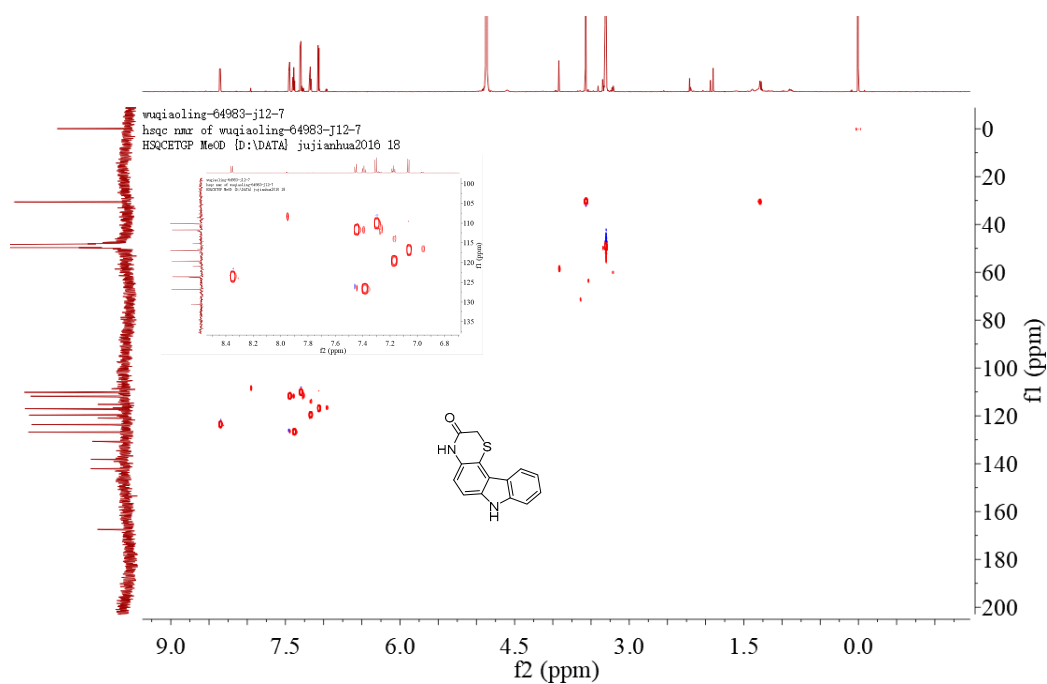

**Figure S6.** HSQC spectrum of compound **1** in methanol- $d_4$ .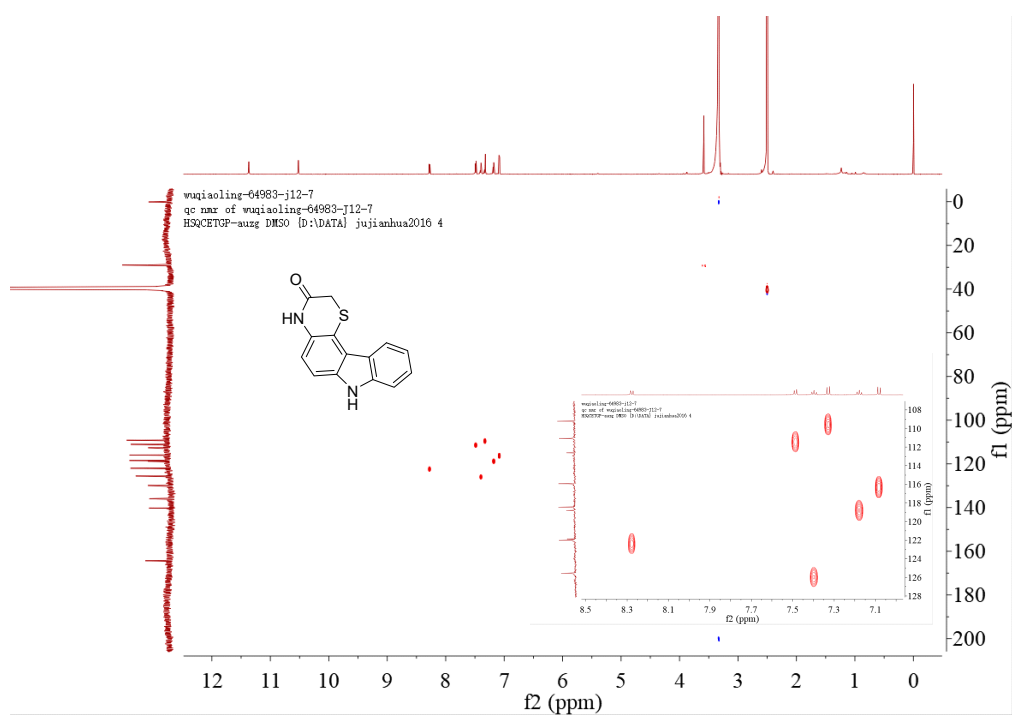**Figure S7.** HSQC spectrum of compound **1** in DMSO- $d_6$ .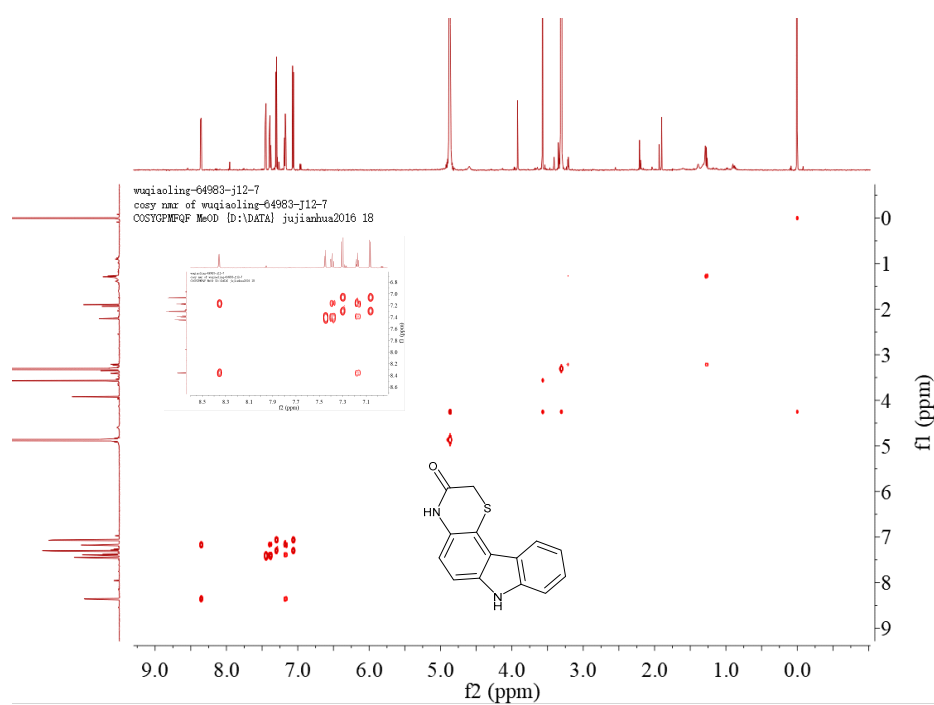

**Figure S8.**  $^1\text{H}$ - $^1\text{H}$  COSY spectrum of compound **1** in methanol- $d_4$ .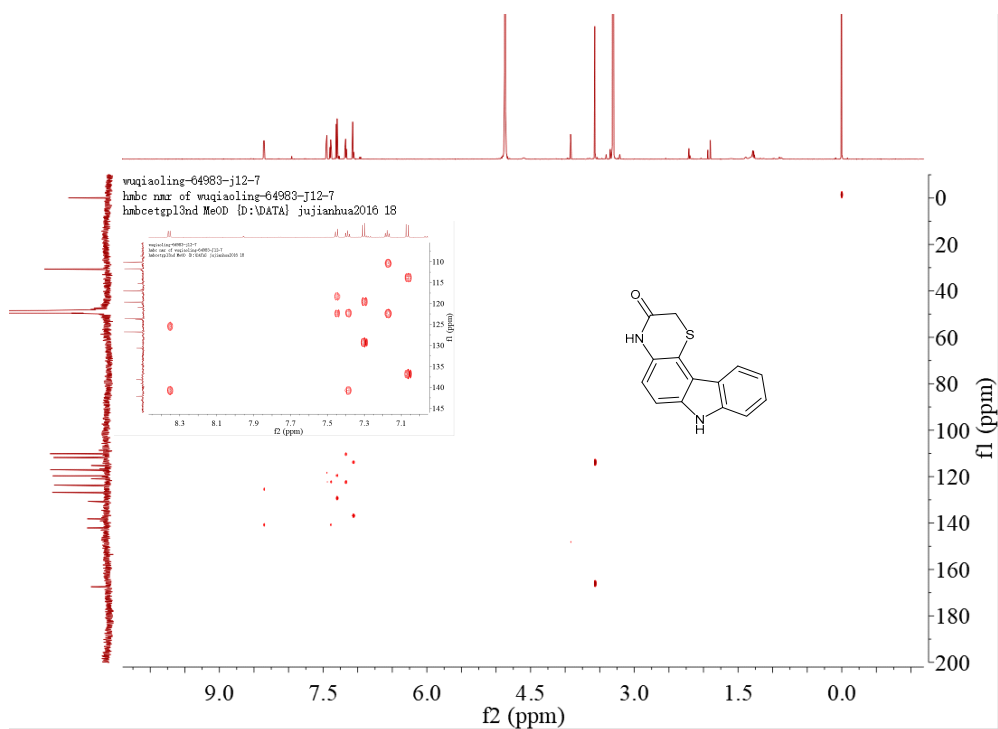**Figure S9.** HMBC spectrum of compound **1** in methanol- $d_4$ .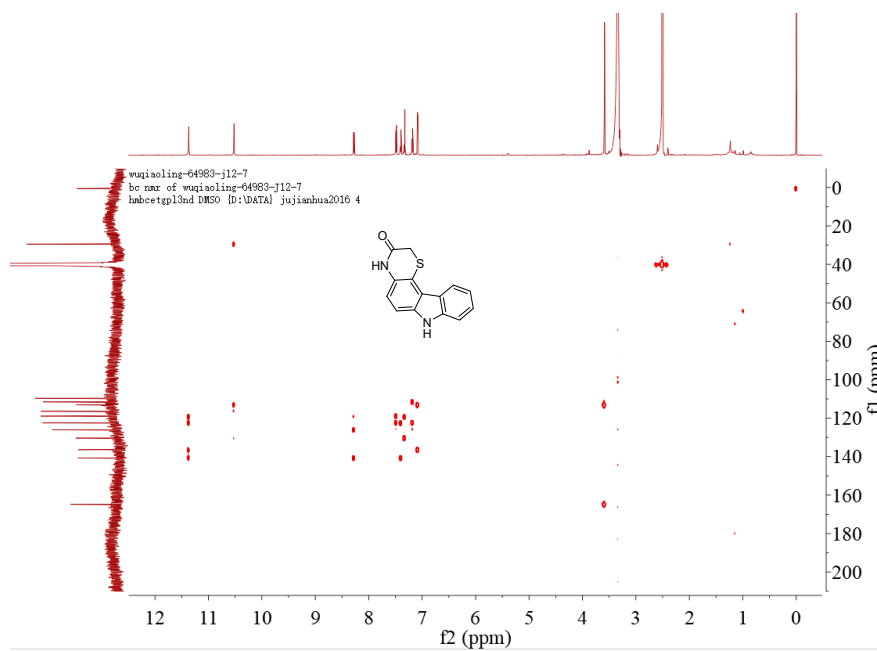**Figure S10.** HMBC spectrum of compound **1** in DMSO- $d_6$ .

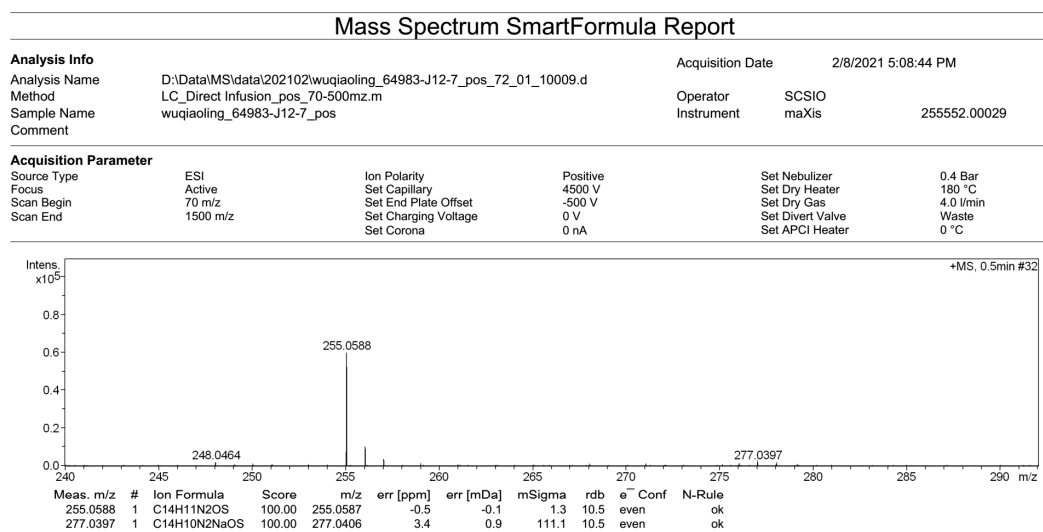

wuqiaoling\_64983-J12-7\_pos\_72\_01\_10009.d  
Bruker Compass DataAnalysis 4.1

printed: 7/28/2022 5:39:59 PM

by: SCSIO

Page 1 of 1

**Figure S11.** HRESIMS of compound **1**.



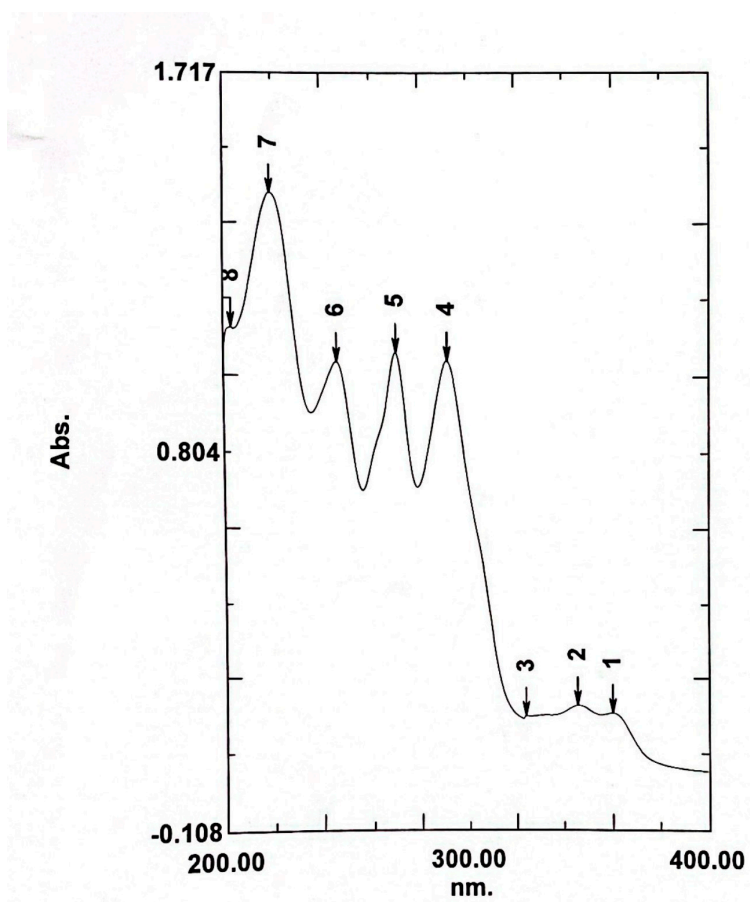

**Figure S12.** UV spectrum of compound **1**.

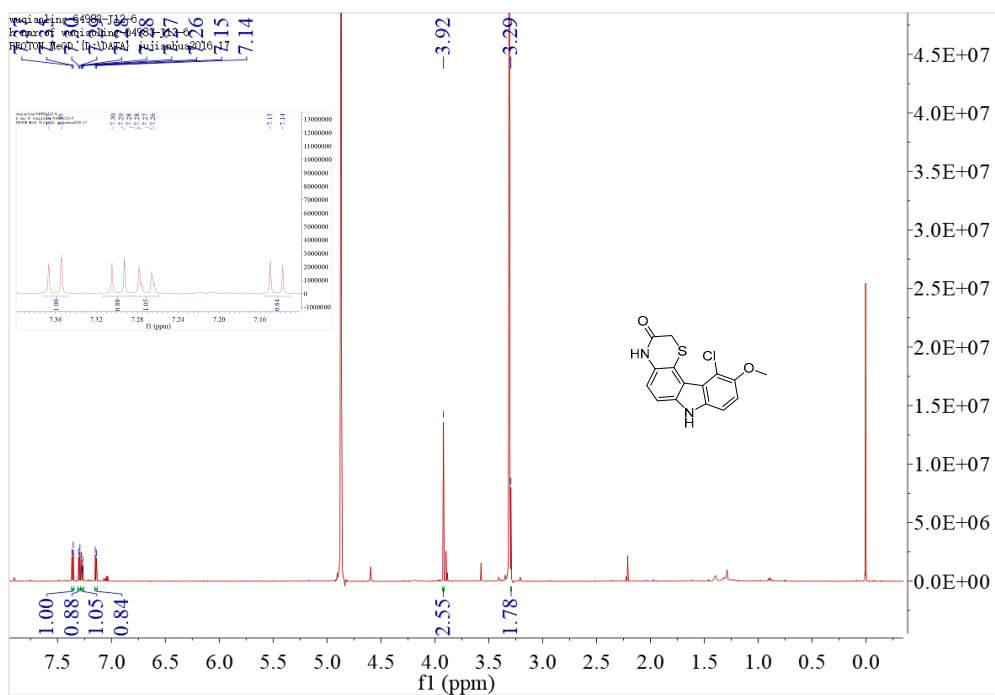

Figure S13. <sup>1</sup>H-NMR spectrum of compound **2** in methanol-*d*<sub>4</sub>.

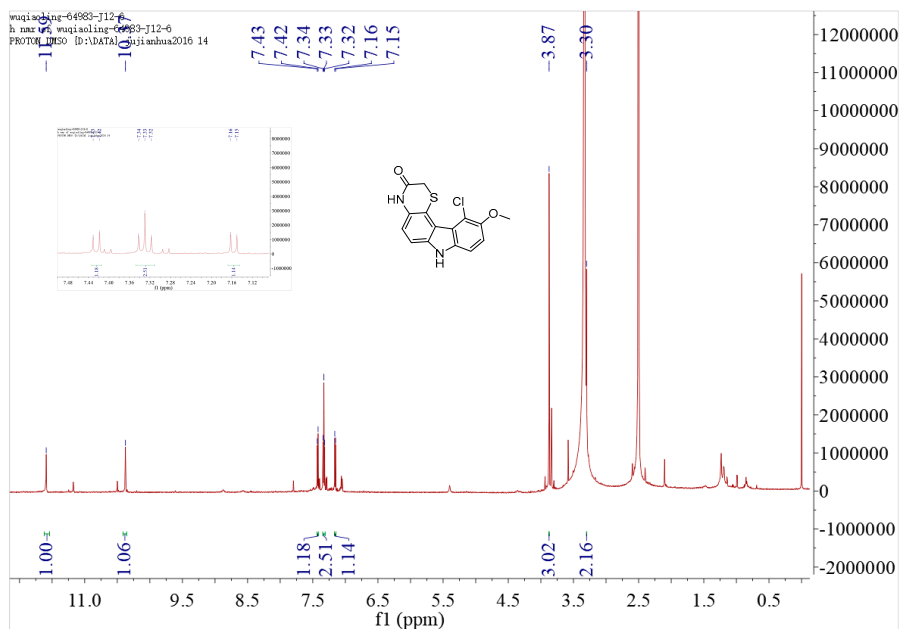

Figure S14. <sup>1</sup>H-NMR spectrum of compound **2** in DMSO-*d*<sub>6</sub>.

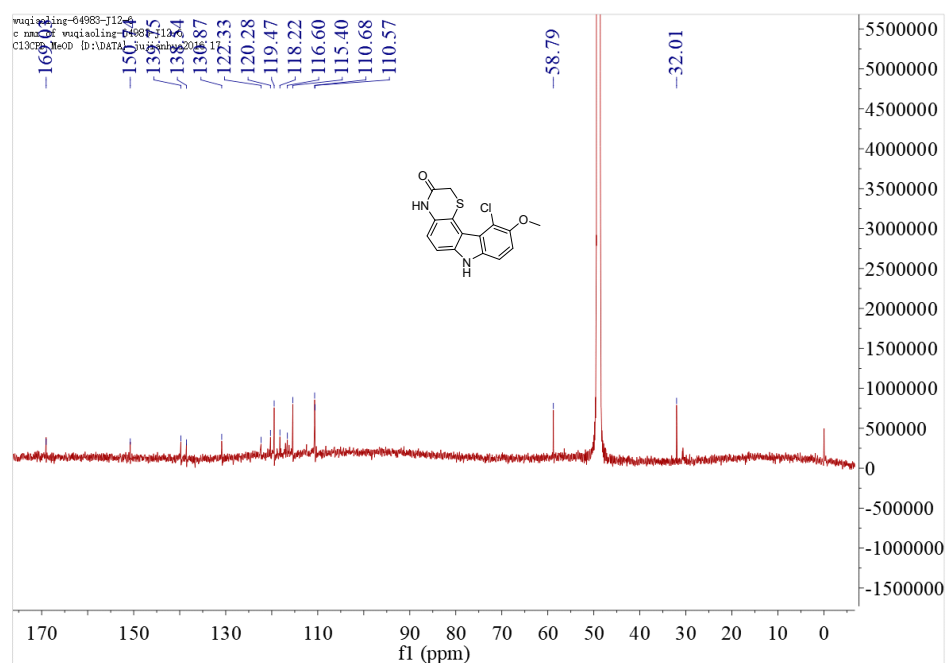

Figure S15.  $^{13}\text{C}$ -NMR spectrum of compound **2** in methanol- $d_4$ .

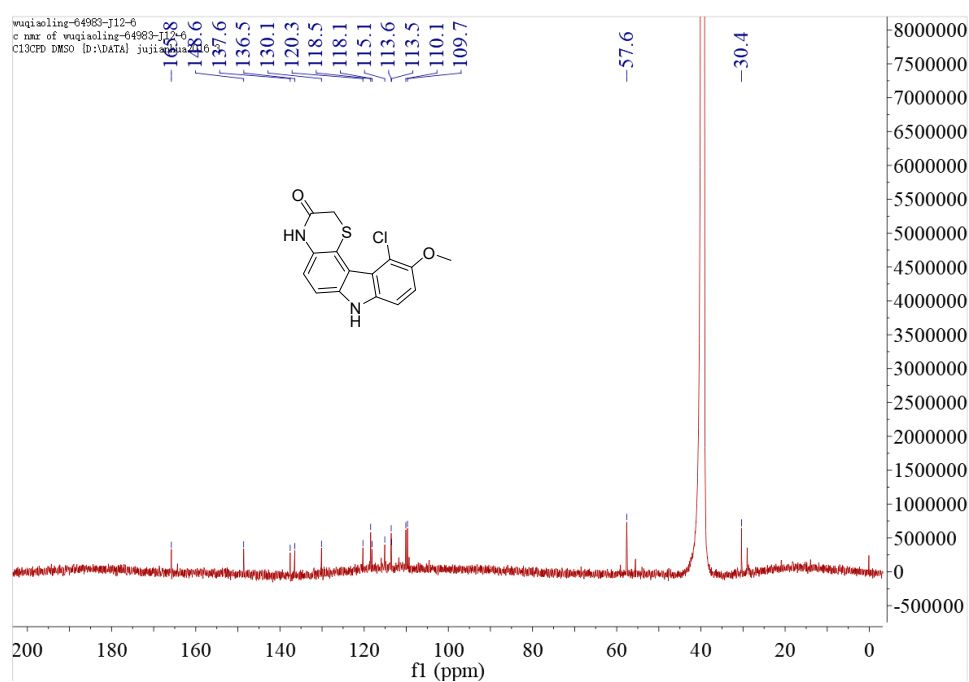

Figure S16.  $^{13}\text{C}$ -NMR spectrum of compound **2** in DMSO- $d_6$ .

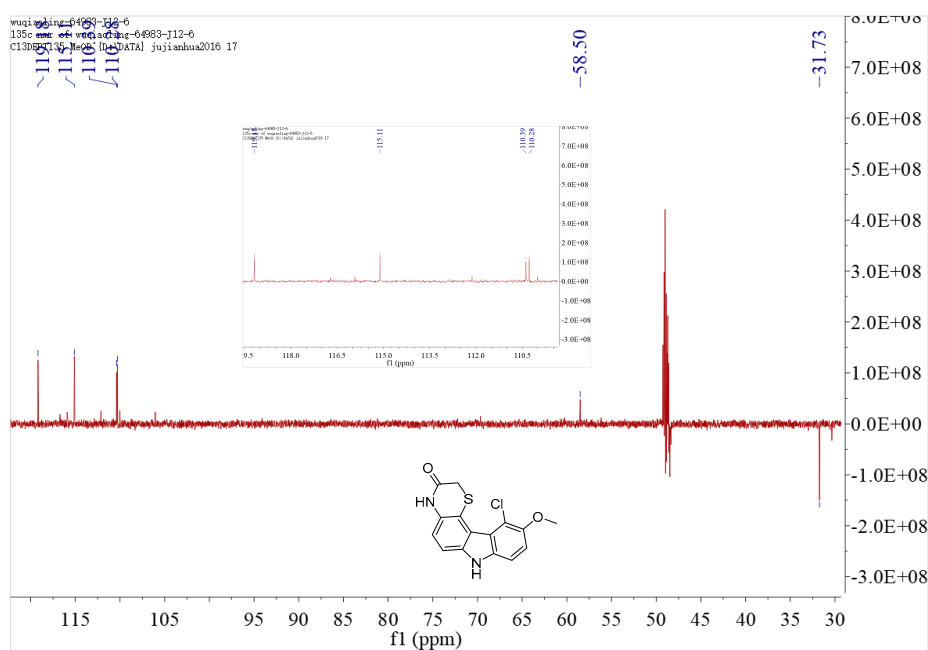

Figure S17. DEPT135 spectrum of compound **2** in methanol-*d*<sub>4</sub>.

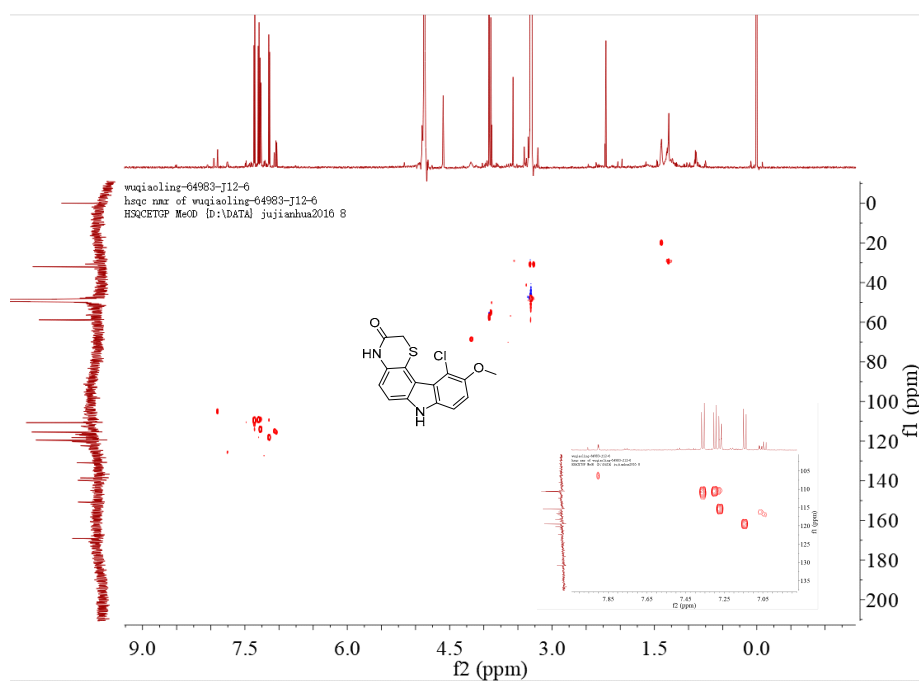

Figure S18. HSQC spectrum of compound **2** in methanol-*d*<sub>4</sub>.

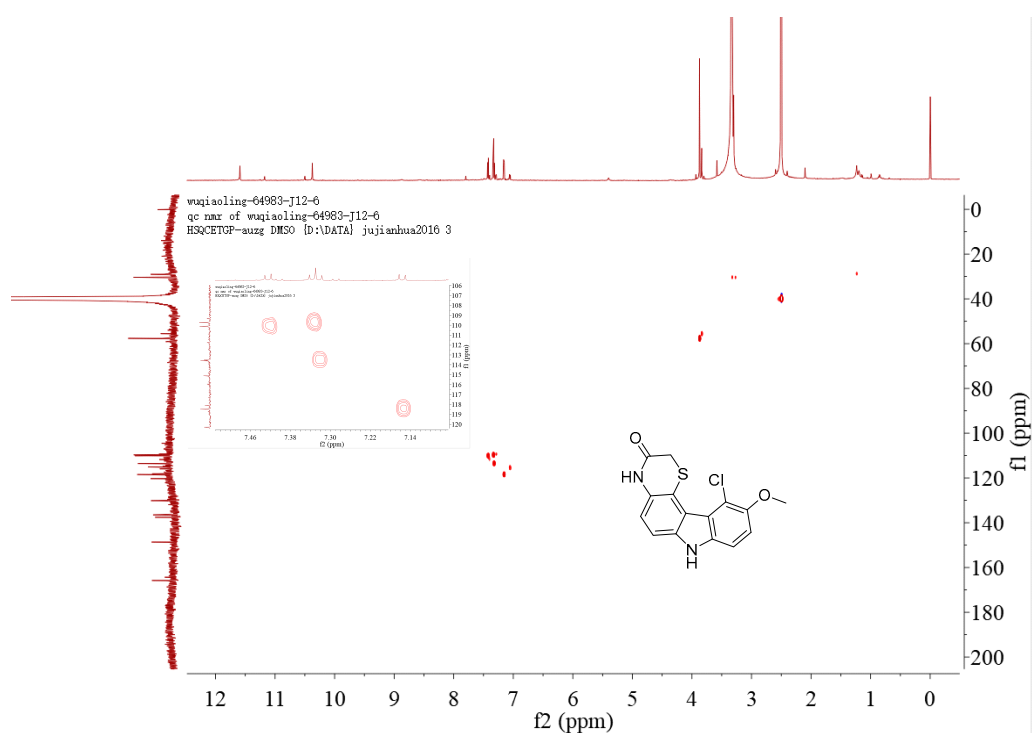

Figure S19. HSQC spectrum of compound 2 in DMSO- $d_6$ .

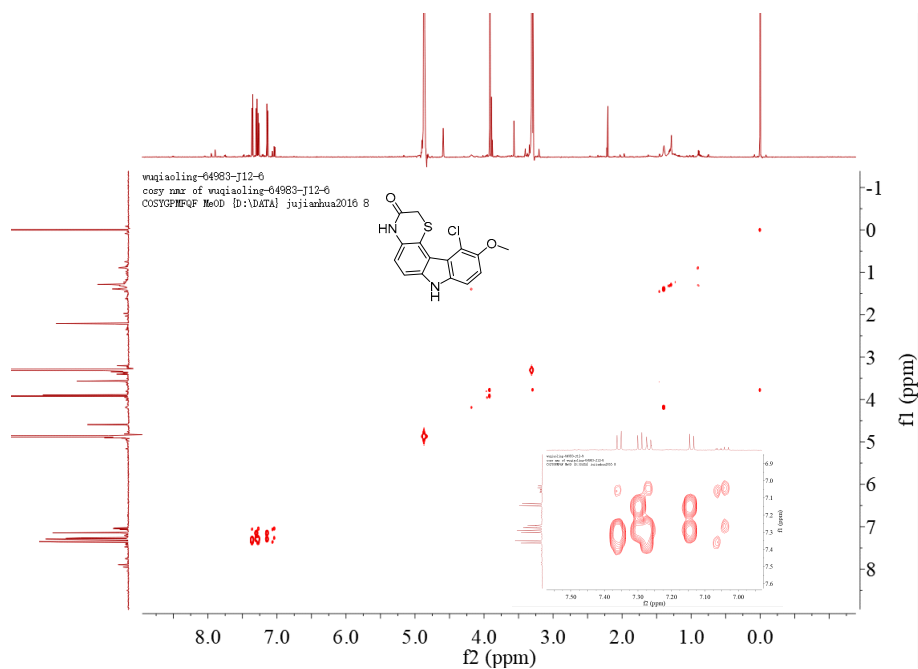

Figure S20.  $^1\text{H}$ - $^1\text{H}$  COSY spectrum of compound 2 in methanol- $d_4$ .

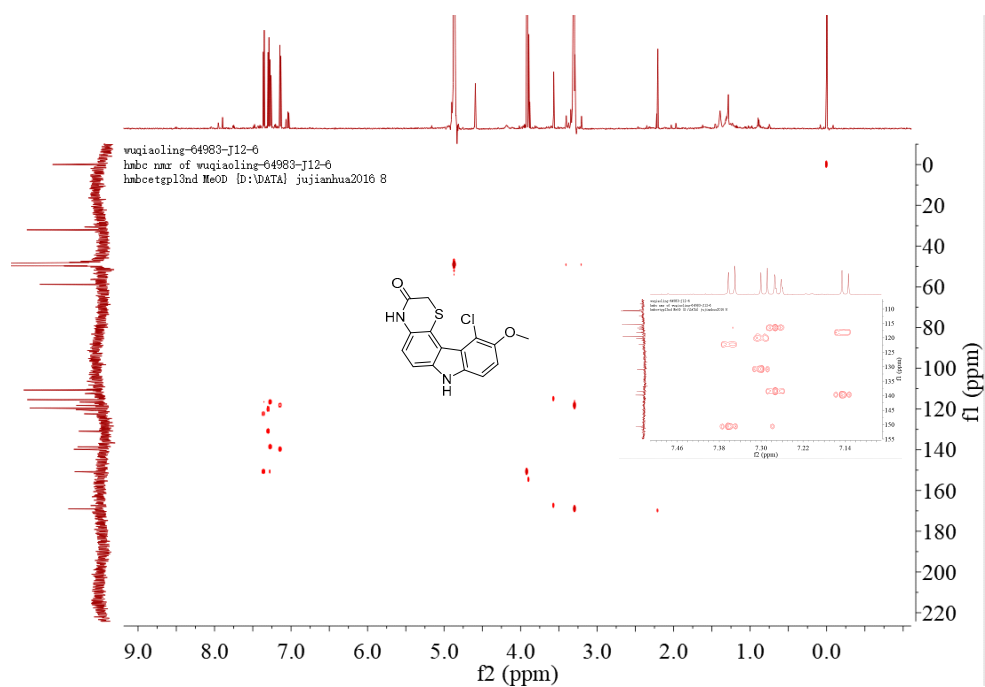

**Figure S21.** HMBC spectrum of compound **2** in methanol-*d*<sub>4</sub>.

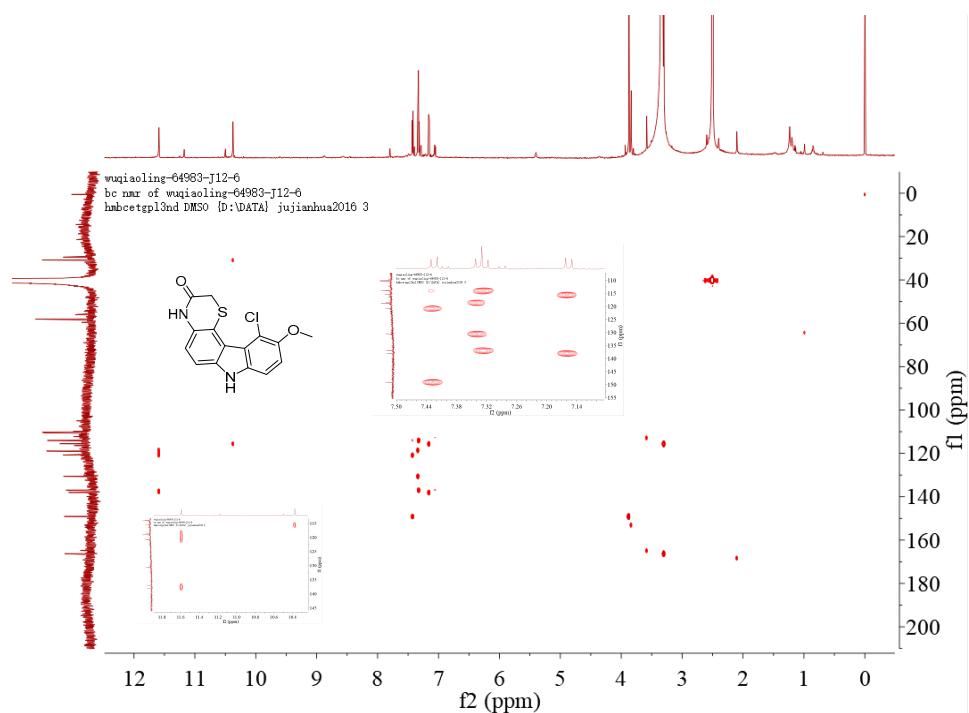

**Figure S22.** HMBC spectrum of compound **2** in DMSO-*d*<sub>6</sub>.

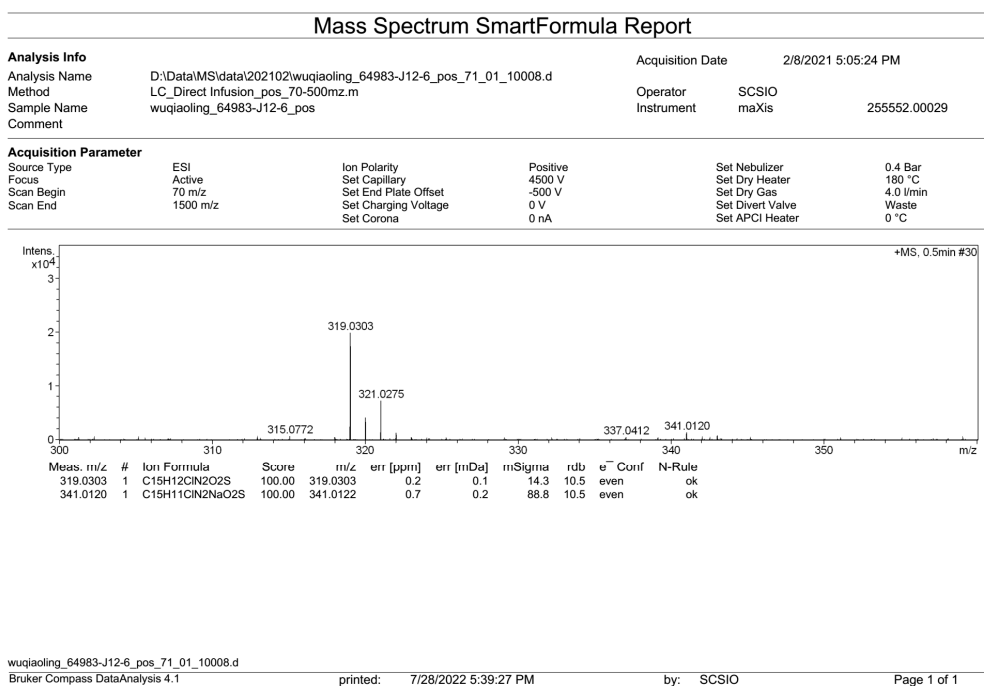

**Figure S23.** HRESIMS of compound **2**.

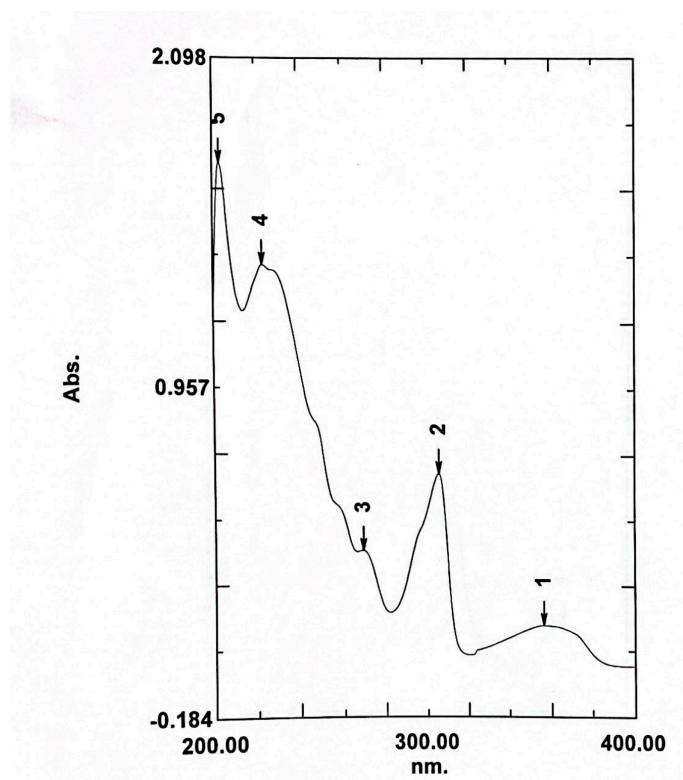

**Figure S24.** UV spectrum of compound **2**.



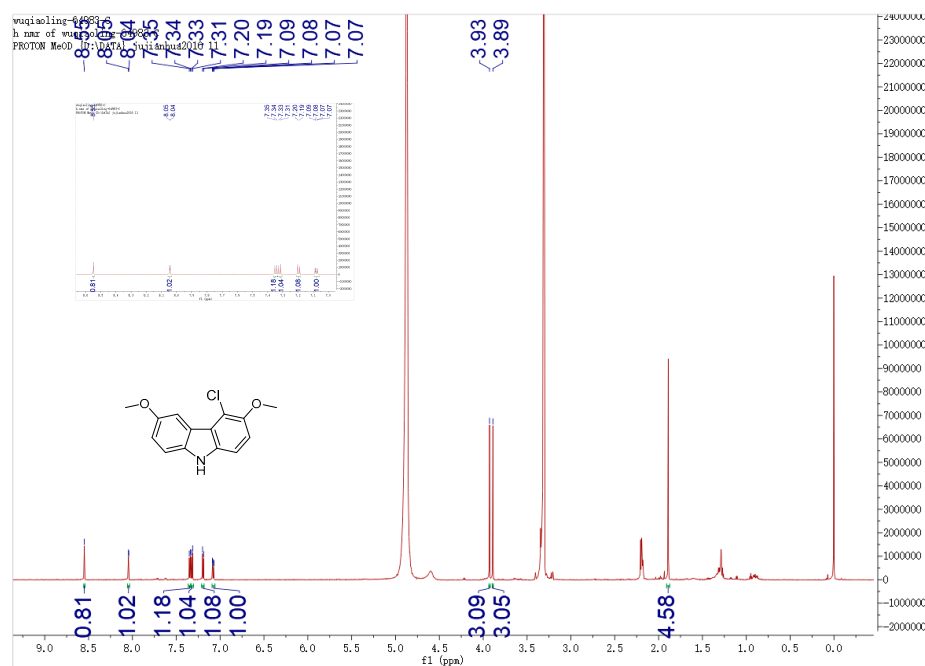

Figure S25.  $^1\text{H}$ -NMR spectrum of compound **3** in methanol- $d_4$ .

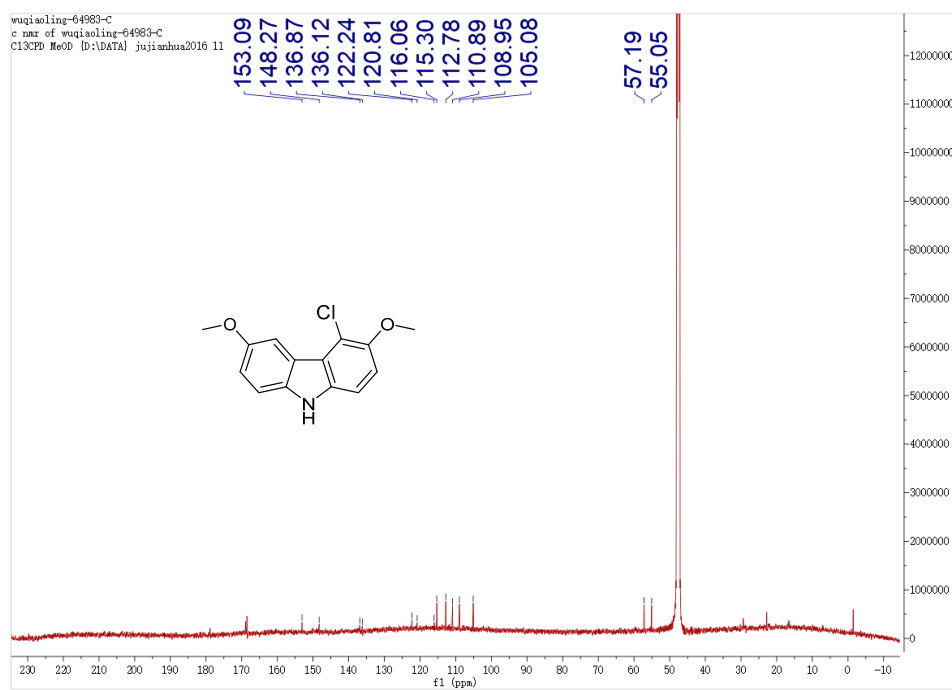

**Figure S26.**  $^{13}\text{C}$ -NMR spectrum of compound **3** in methanol- $d_4$ .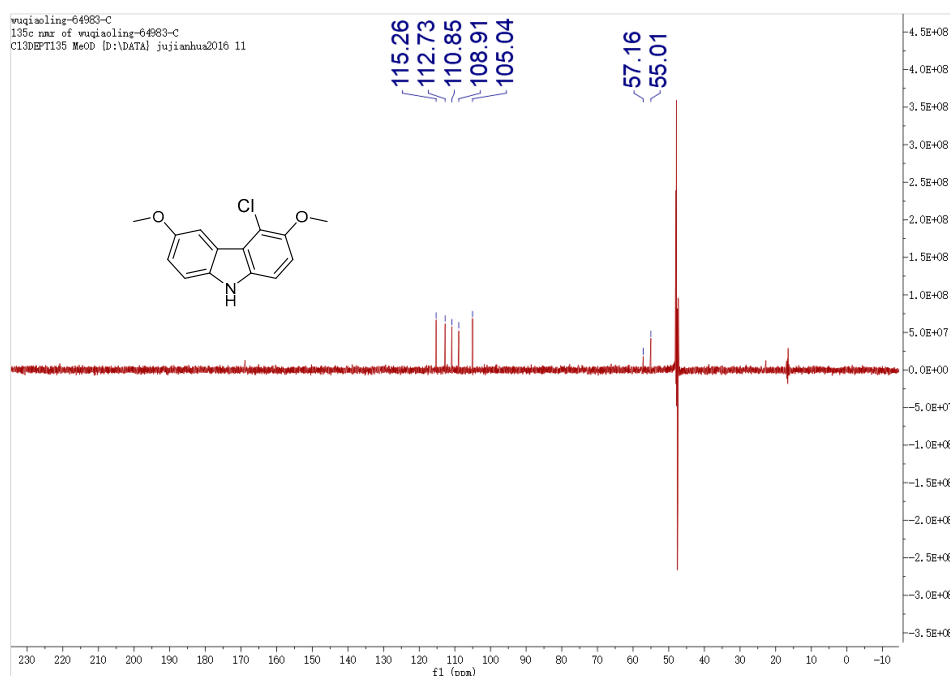**Figure S27.** DEPT135 spectrum of compound **3** in methanol- $d_4$ .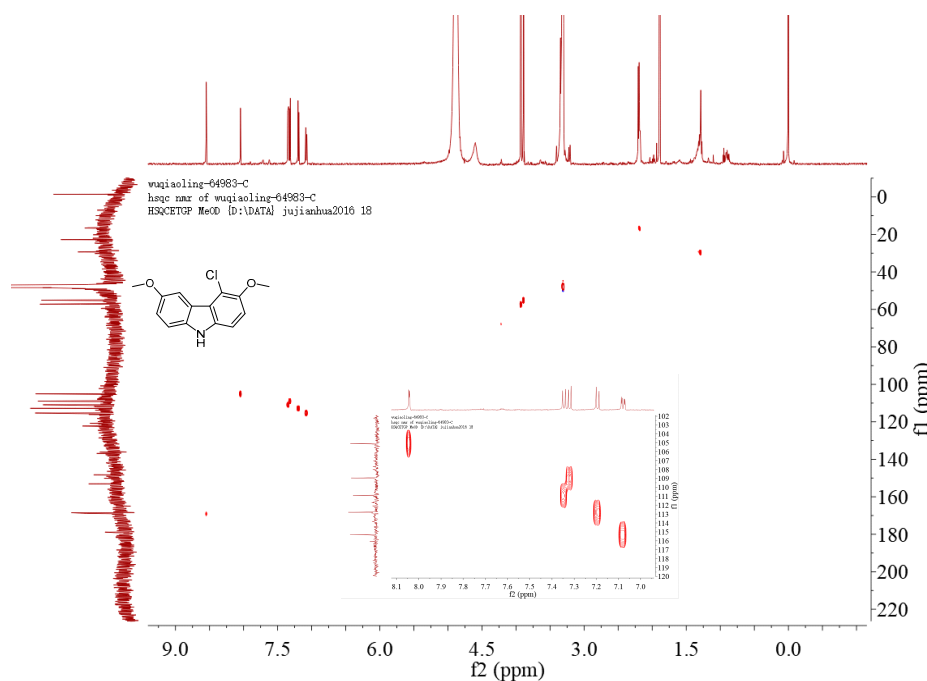

**Figure S28.** HSQC spectrum of compound **3** in methanol-*d*<sub>4</sub>.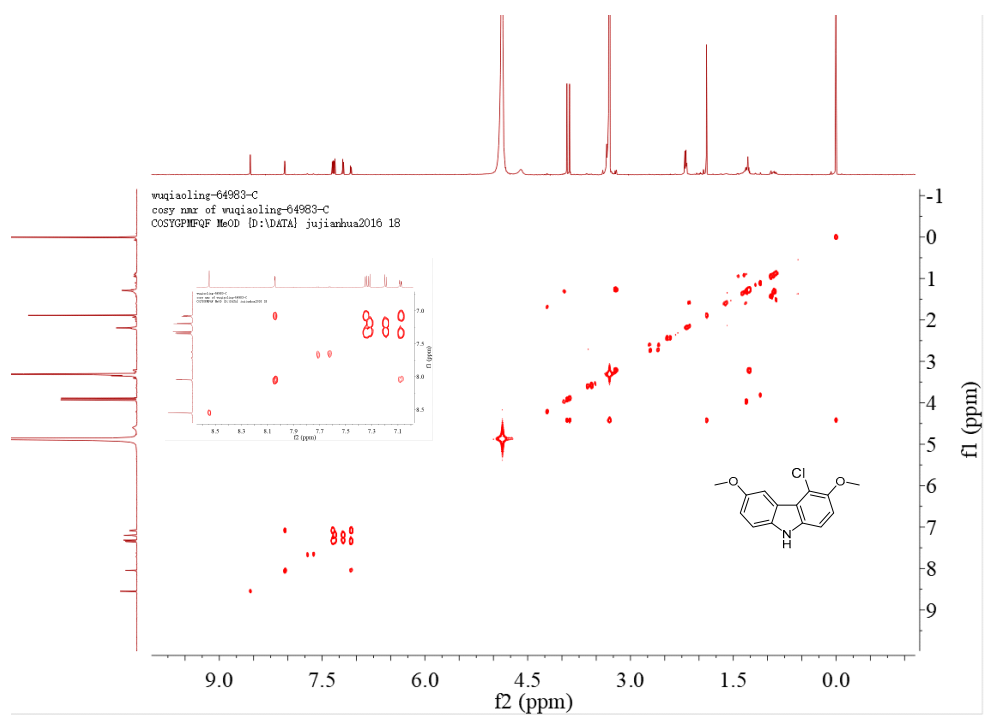**Figure S29.** <sup>1</sup>H-<sup>1</sup>H COSY spectrum of compound **3** in methanol-*d*<sub>4</sub>.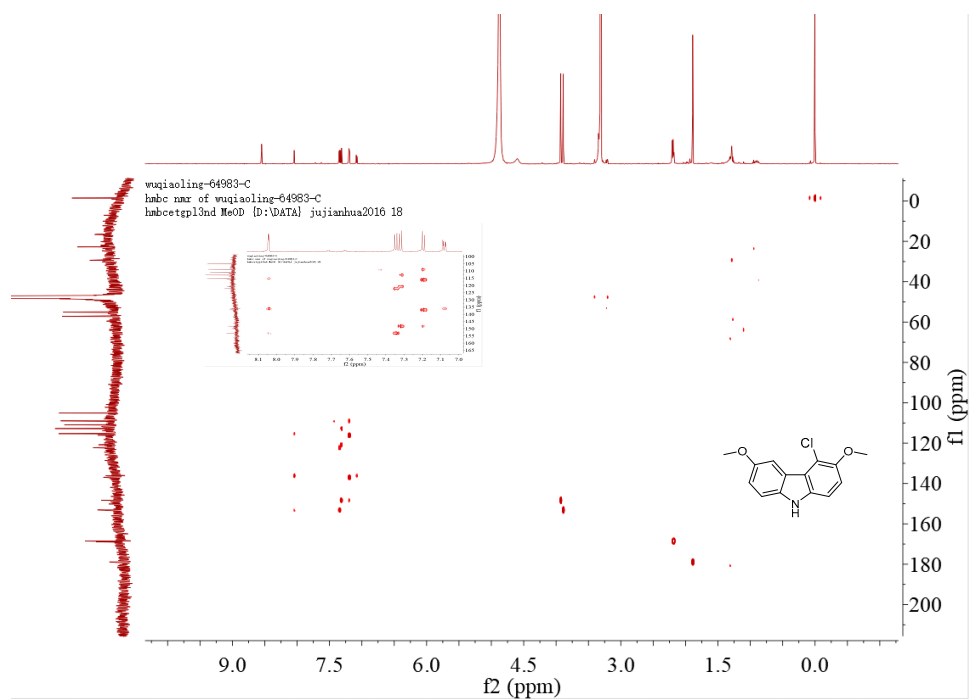**Figure S30.** HMBC spectrum of compound **3** in methanol-*d*<sub>4</sub>.

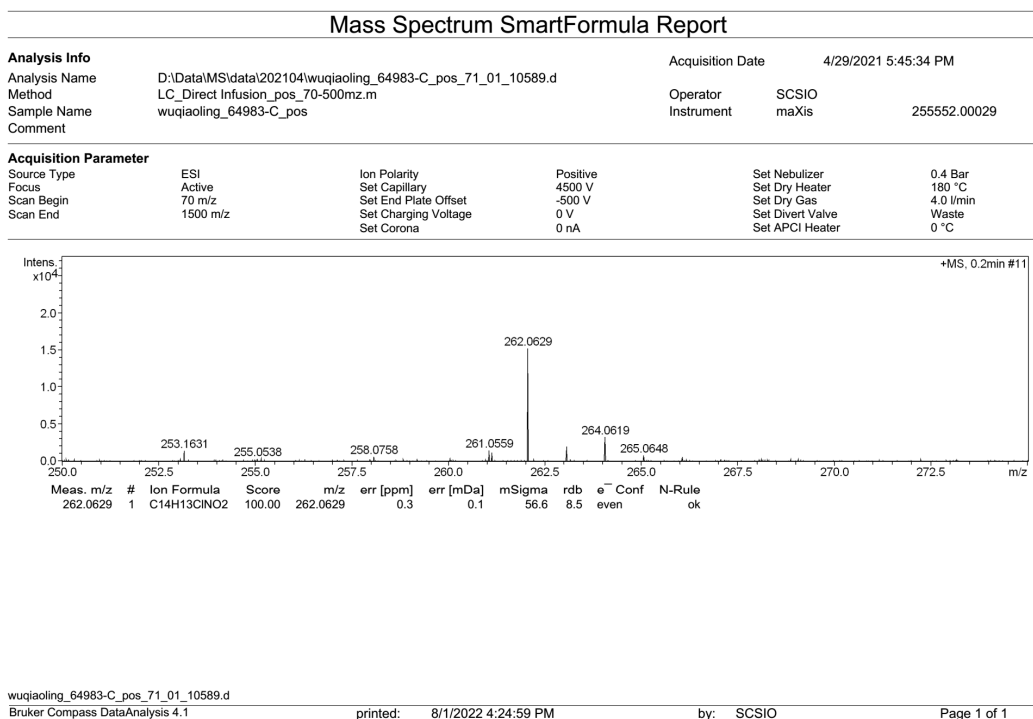

**Figure S31.** HRESIMS of compound **3**.

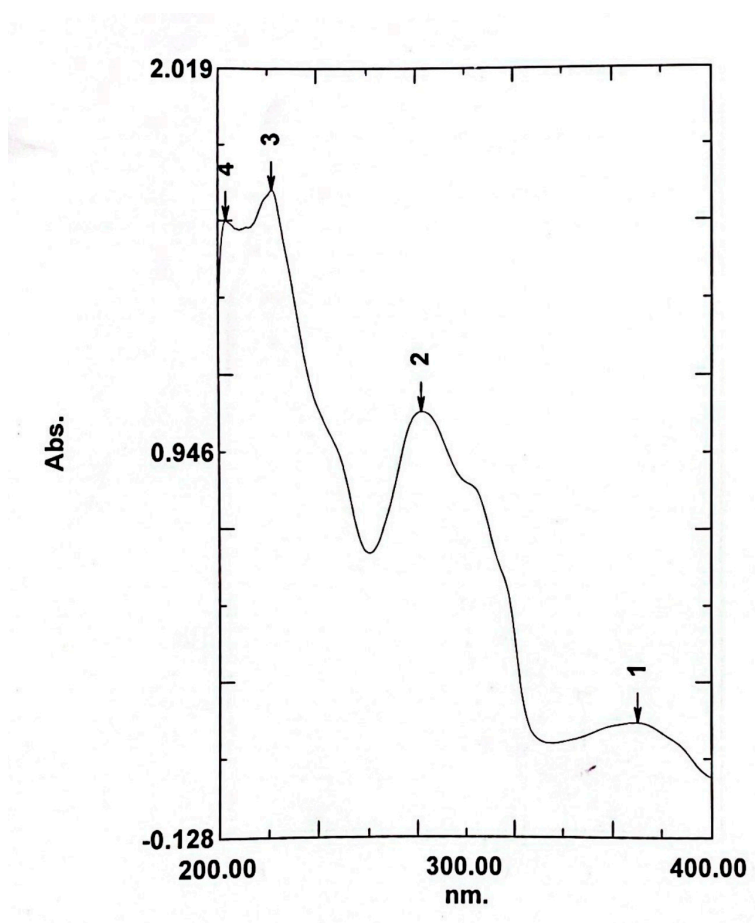

**Figure S32.** UV spectrum of compound **3**.

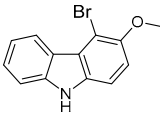

**Figure S33.**  $^1\text{H}$ -NMR spectrum of compound **4** in chloroform- $d$ .

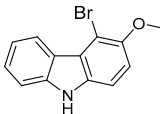

**Figure S34.**  $^{13}\text{C}$ -NMR spectrum of compound **4** in chloroform-*d*.

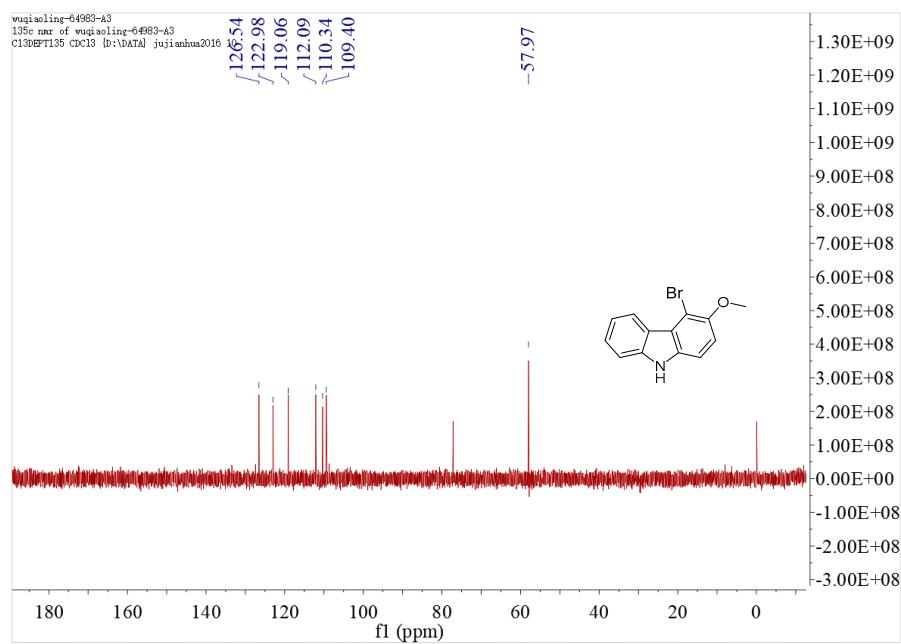

**Figure S35.** DEPT135 spectrum of compound 4 in chloroform-*d*.

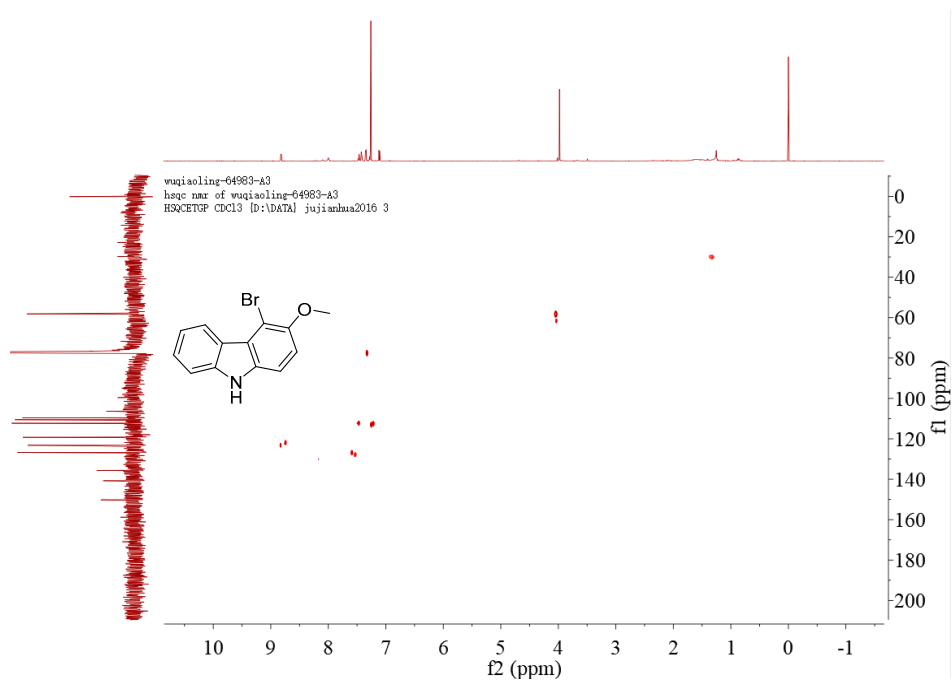

**Figure S36.** HSQC spectrum of compound 4 in chloroform-*d*.

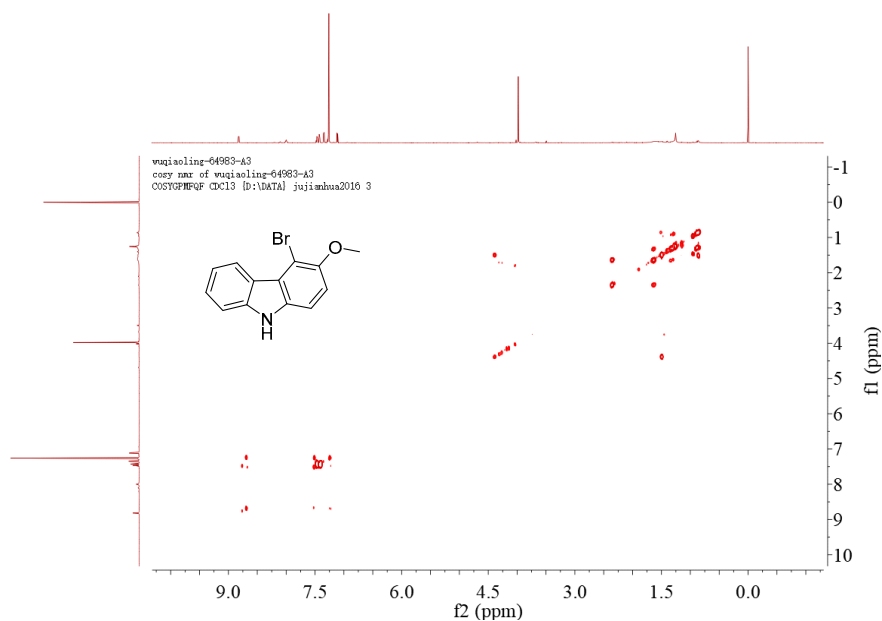

Figure S37.  $^1\text{H}$ - $^1\text{H}$  COSY spectrum of compound 4 in chloroform- $d$ .

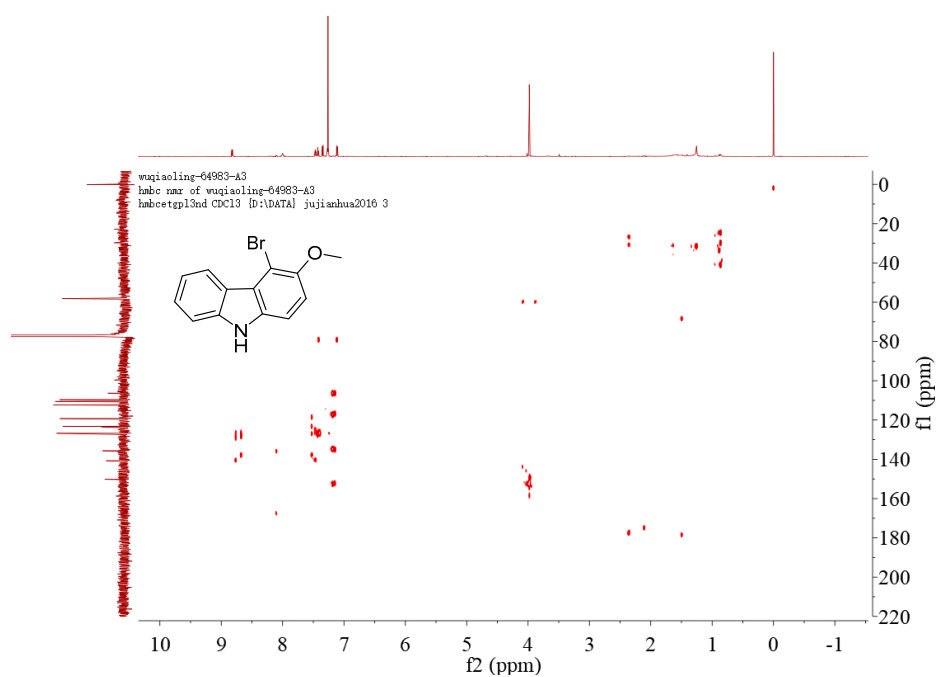

Figure S38. HMBC spectrum of compound 4 in chloroform- $d$ .



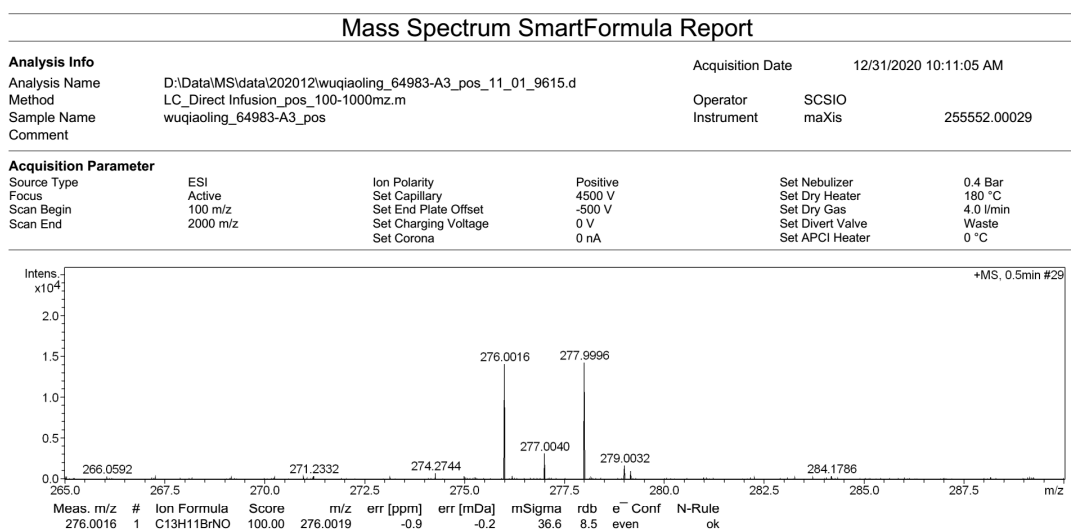

wuqiaoling\_64983-A3\_pos\_11\_01\_9615.d  
Bruker Compass DataAnalysis 4.1

printed: 7/28/2022 5:41:24 PM

by: SCSIO

Page 1 of 1

**Figure S39.** HRESIMS of compound 4.

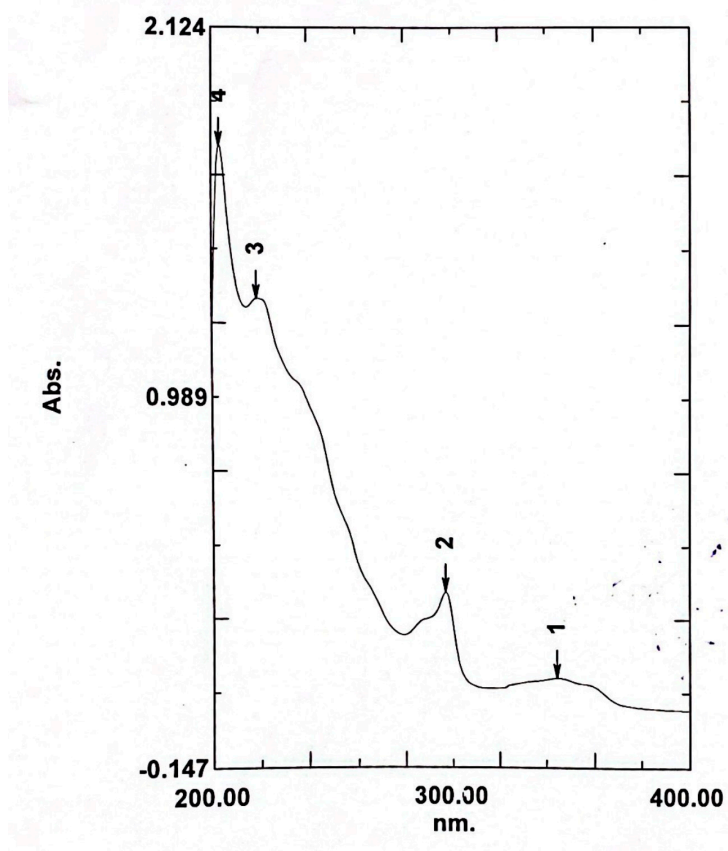

**Figure S40.** UV spectrum of compound 4.

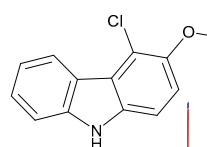

**Figure S41.**  $^1\text{H}$ -NMR spectrum of compound **5** in chloroform- $d$ .

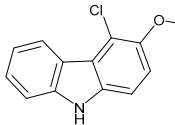

**Figure S42.**  $^{13}\text{C}$ -NMR spectrum of compound **5** in chloroform-*d*.

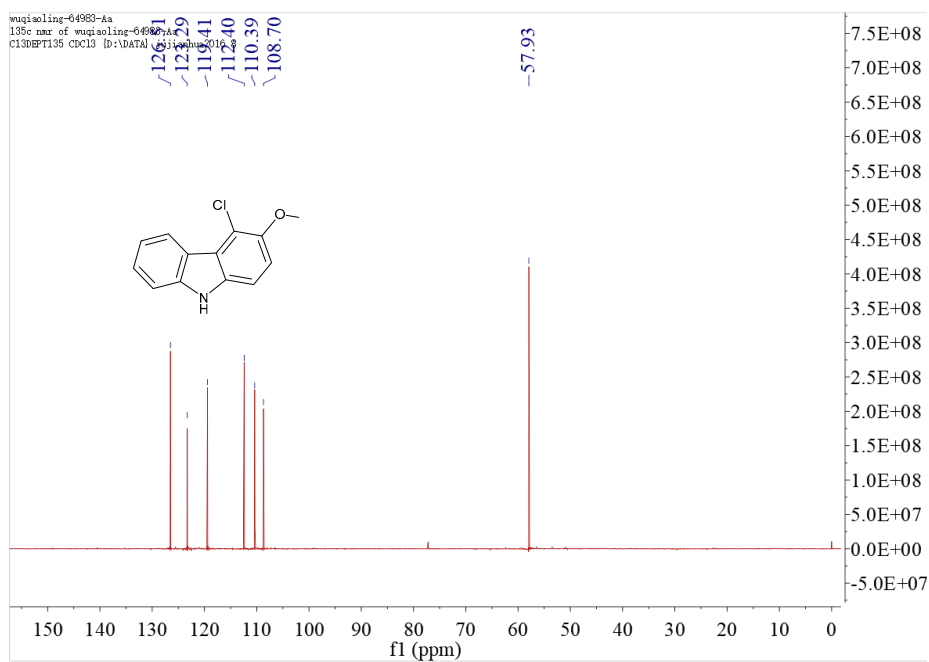

Figure S43. DEPT135 spectrum of compound 5 in chloroform-*d*.

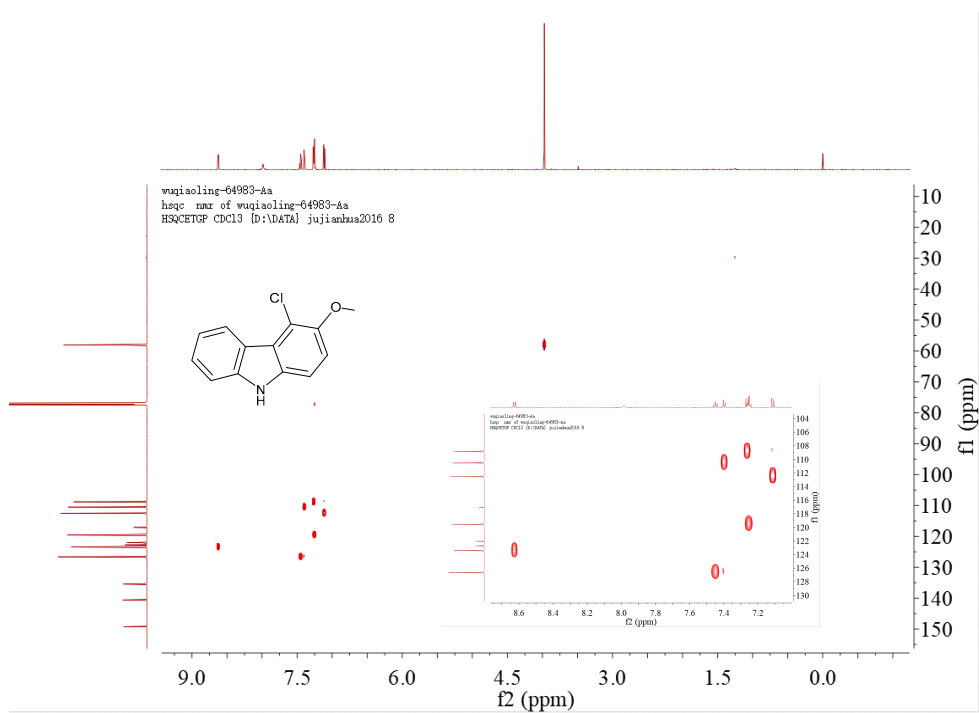

Figure S44. HSQC spectrum of compound 5 in chloroform-*d*.

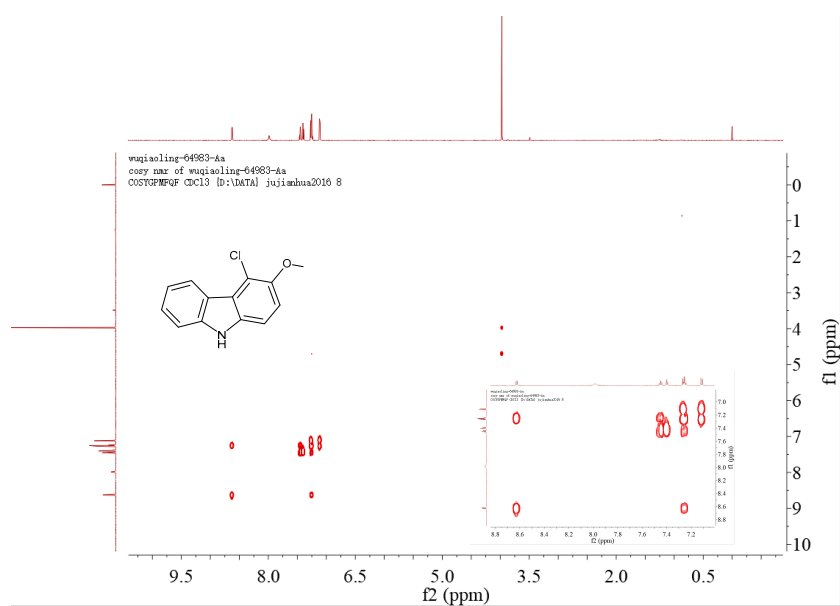

**Figure S45.**  $^1\text{H}$ - $^1\text{H}$  COSY spectrum of compound **5** in chloroform-*d*.

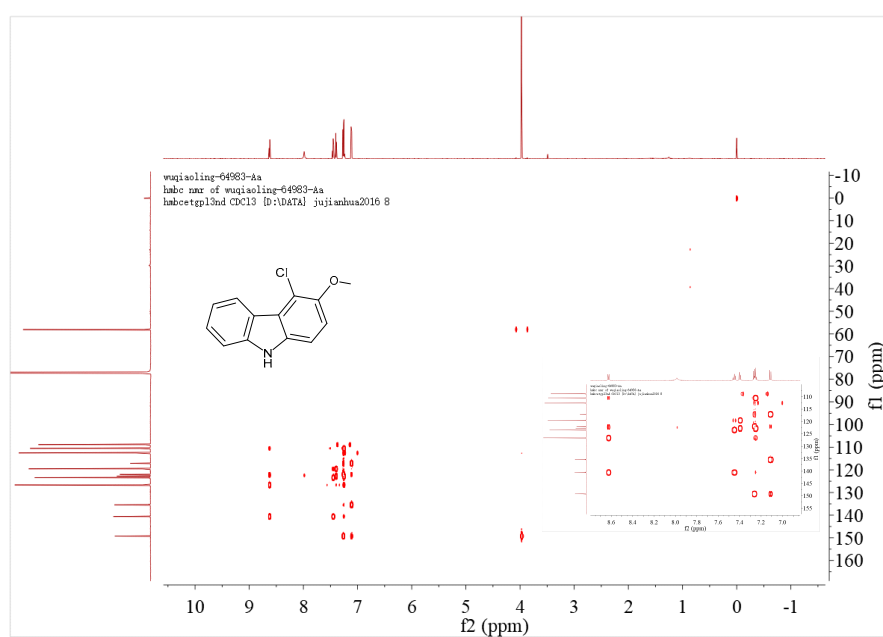

**Figure S46.** HMBC spectrum of compound **5** in chloroform-*d*.

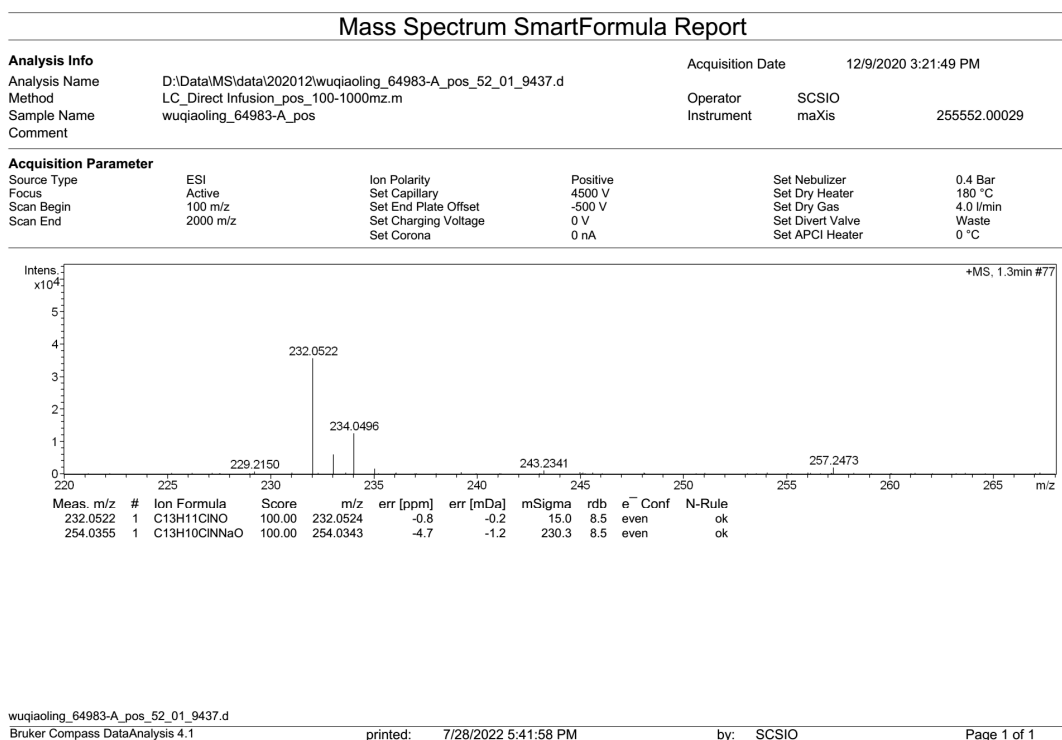

Figure S47. HRESIMS of compound 5.

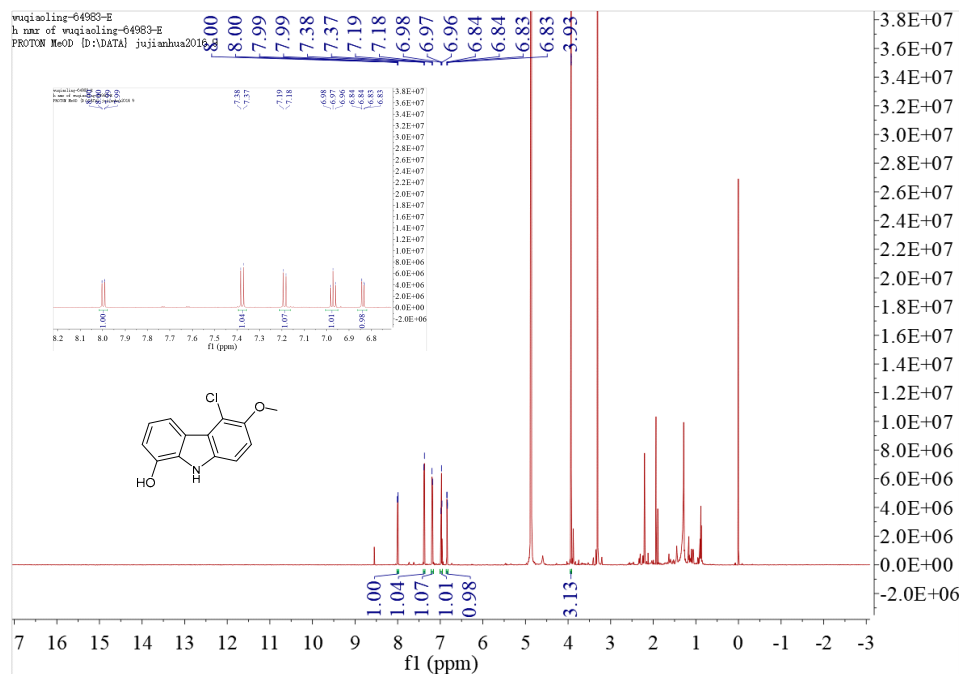Figure S48. <sup>1</sup>H-NMR spectrum of compound 6 in methanol-*d*<sub>4</sub>.

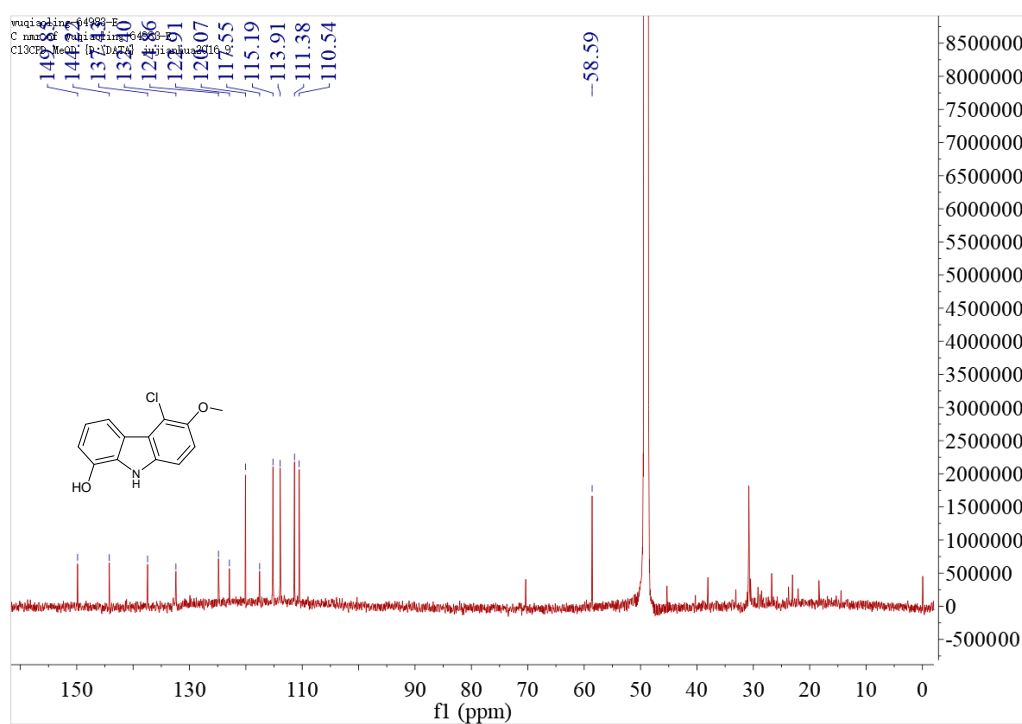

**Figure S49.**  $^{13}\text{C}$ -NMR spectrum of compound **6** in methanol- $d_4$ .

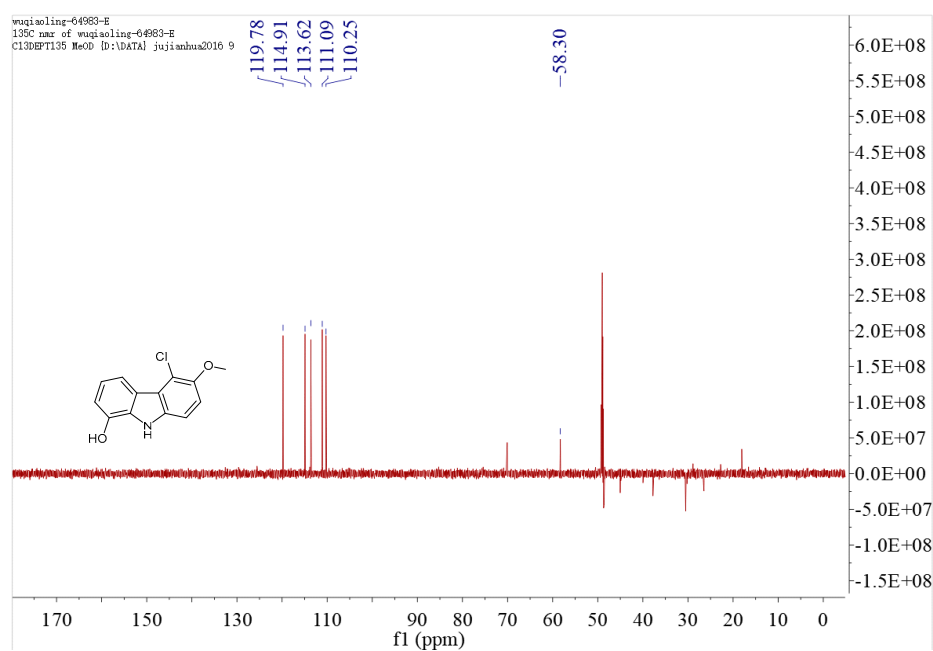

**Figure S50.** DEPT135 spectrum of compound **6** in methanol- $d_4$ .

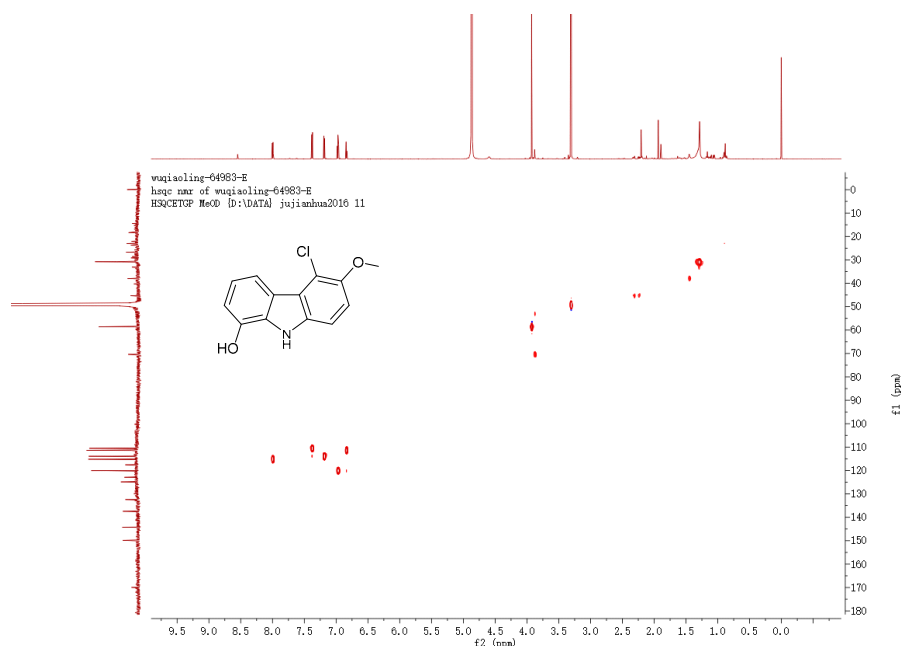

Figure S51. HSQC spectrum of compound 6 in methanol- $d_4$ .

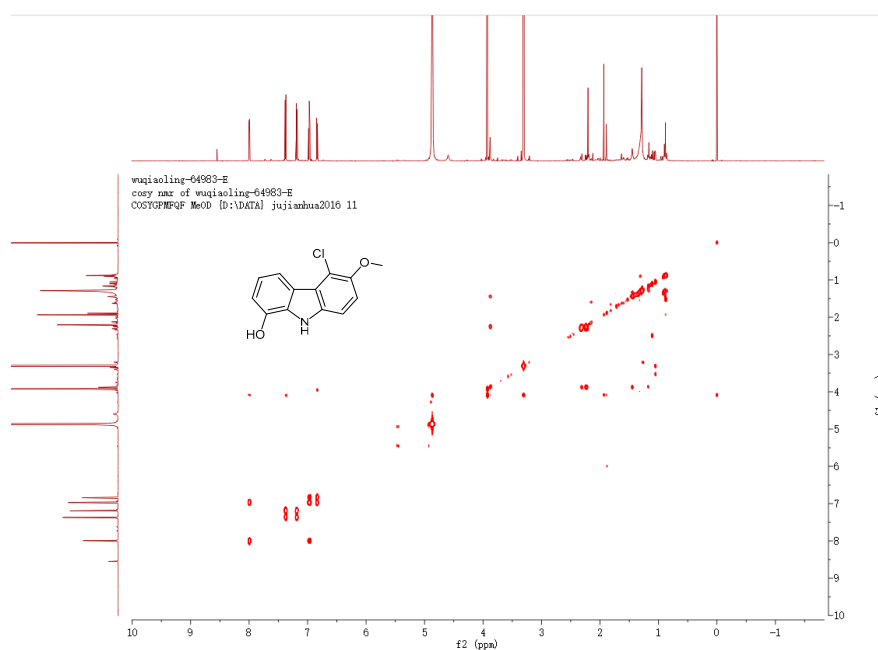

Figure S52.  $^1\text{H}$ - $^1\text{H}$  COSY spectrum of compound 6 in methanol- $d_4$ .



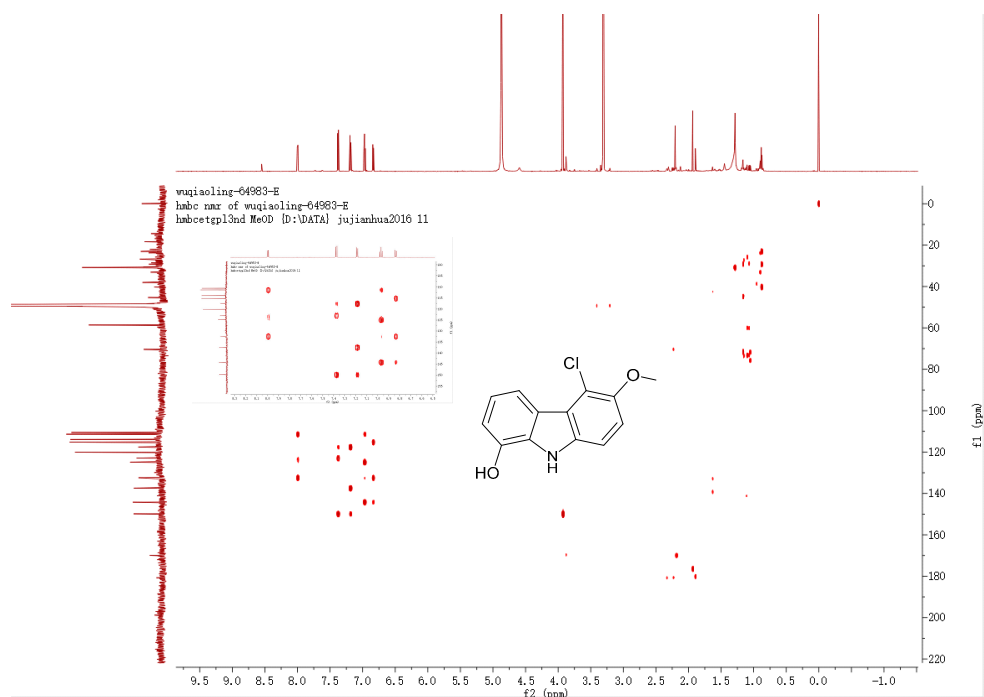Figure S53. HMBC spectrum of compound 6 in mathanol-*d*<sub>4</sub>.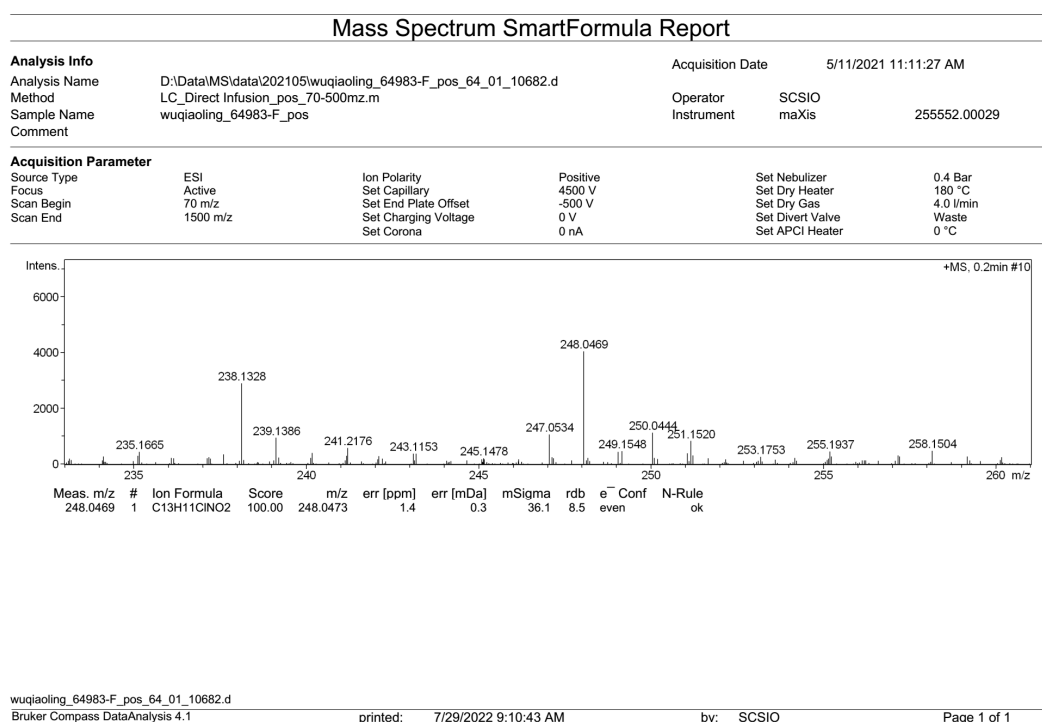

Figure S54. HRESIMS of compound 6.

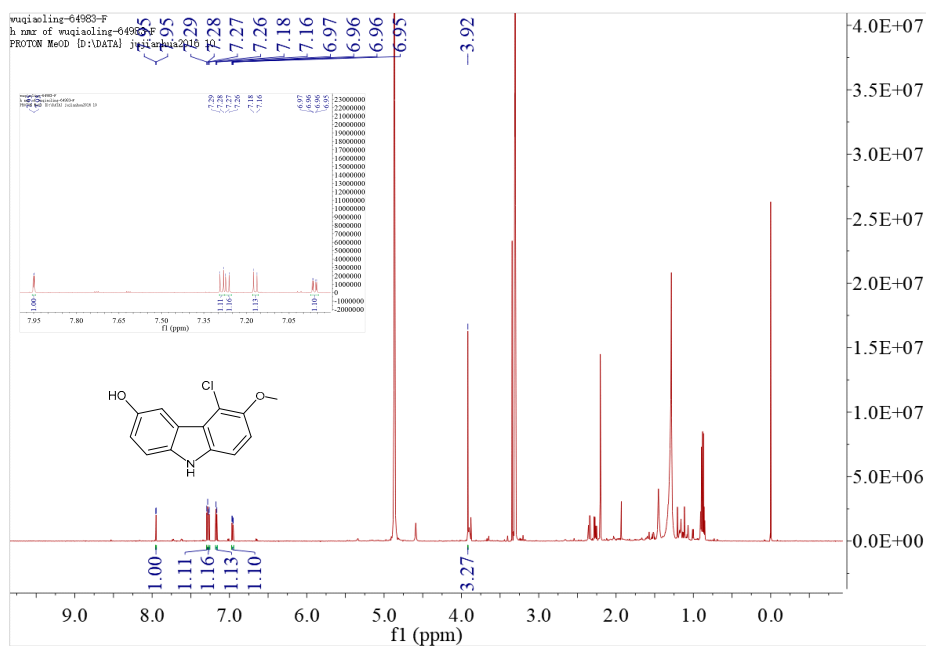

**Figure S55.**  $^1\text{H}$ -NMR spectrum of compound **7** in methanol- $d_4$ .

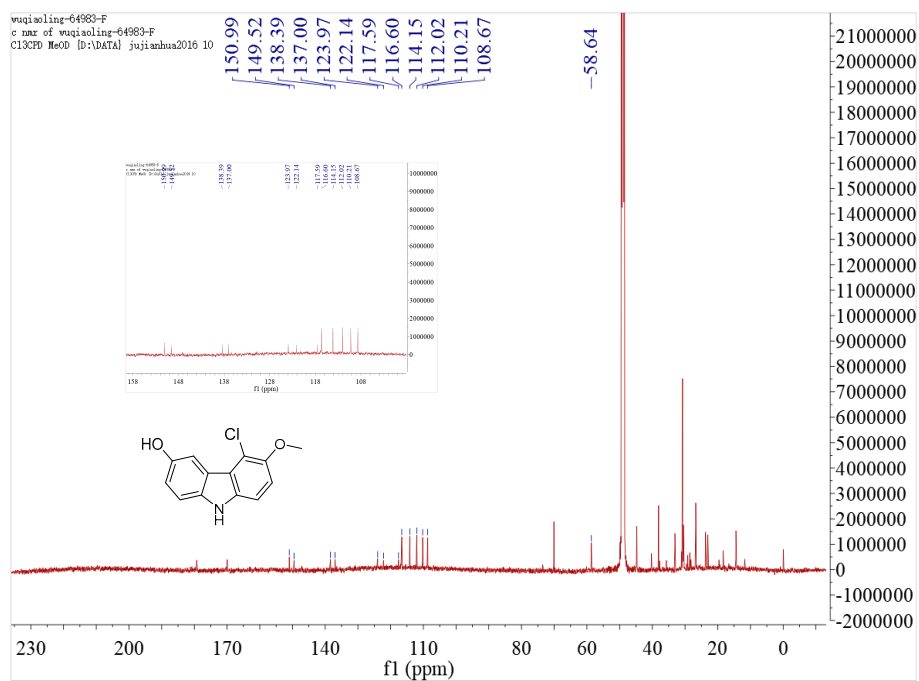

**Figure S56.**  $^{13}\text{C}$ -NMR spectrum of compound **7** in methanol- $d_4$ .

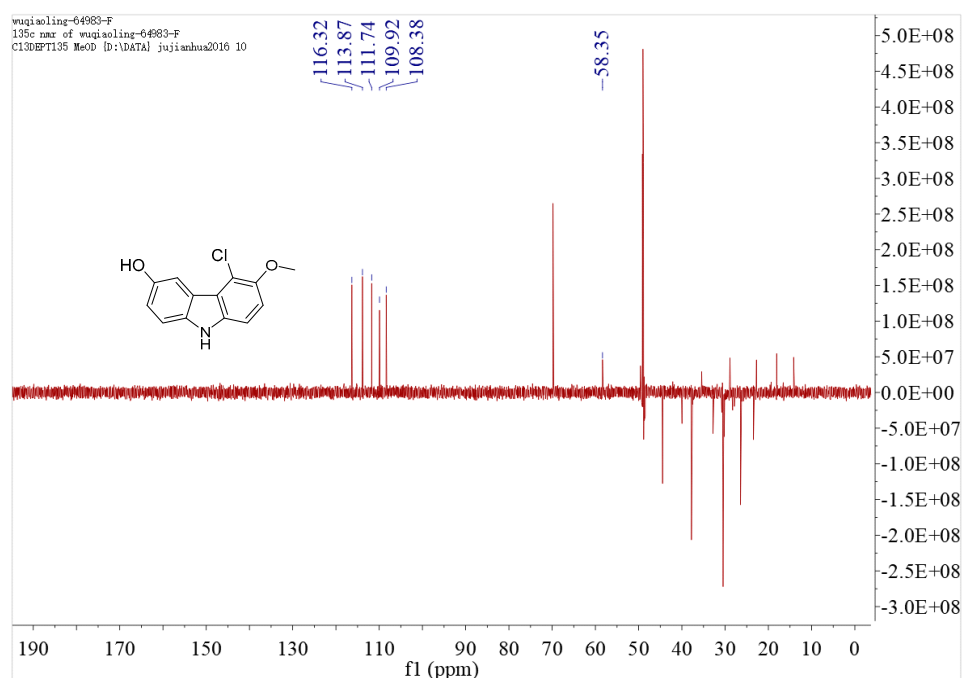

**Figure S57.** DEPT135 spectrum of compound **7** in mathanol-*d*<sub>4</sub>.

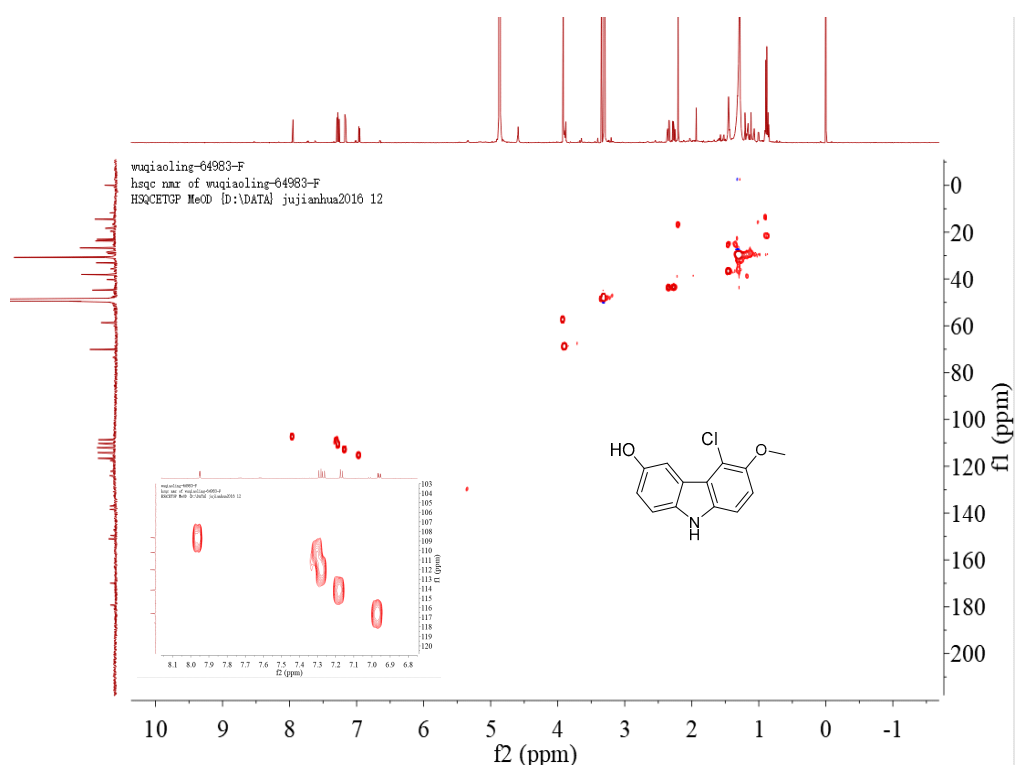

**Figure S58.** HSQC spectrum of compound **7** in mathanol-*d*<sub>4</sub>.

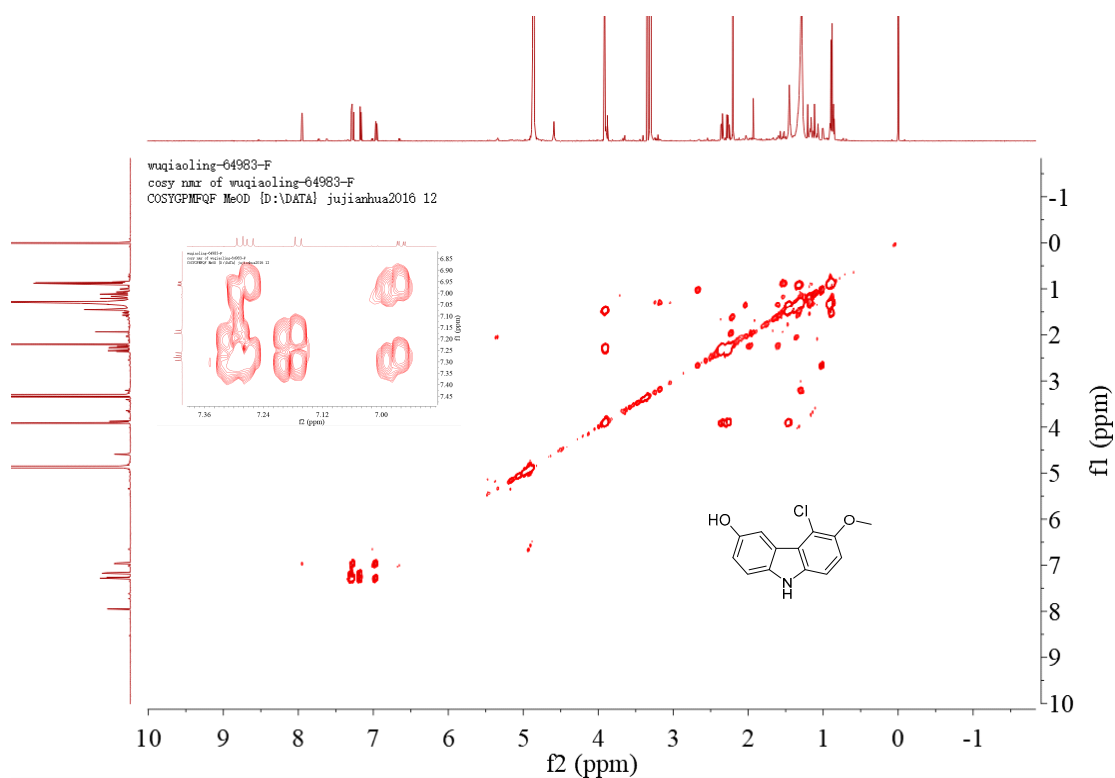

Figure S59.  $^1\text{H}$ - $^1\text{H}$  COSY spectrum of compound 7 in methanol- $d_4$ .

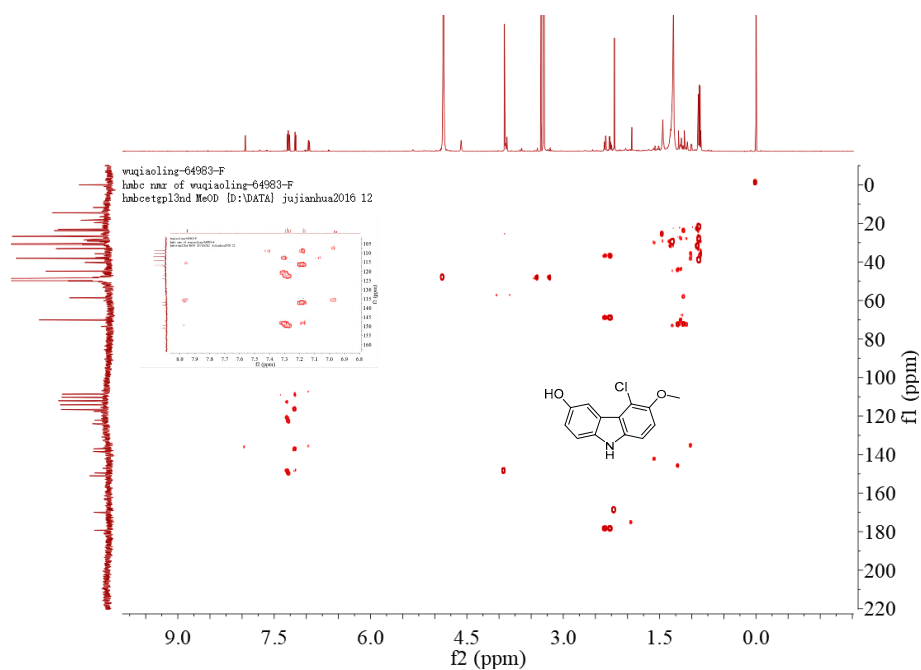

Figure S60. HMBC spectrum of compound 7 in methanol- $d_4$ .

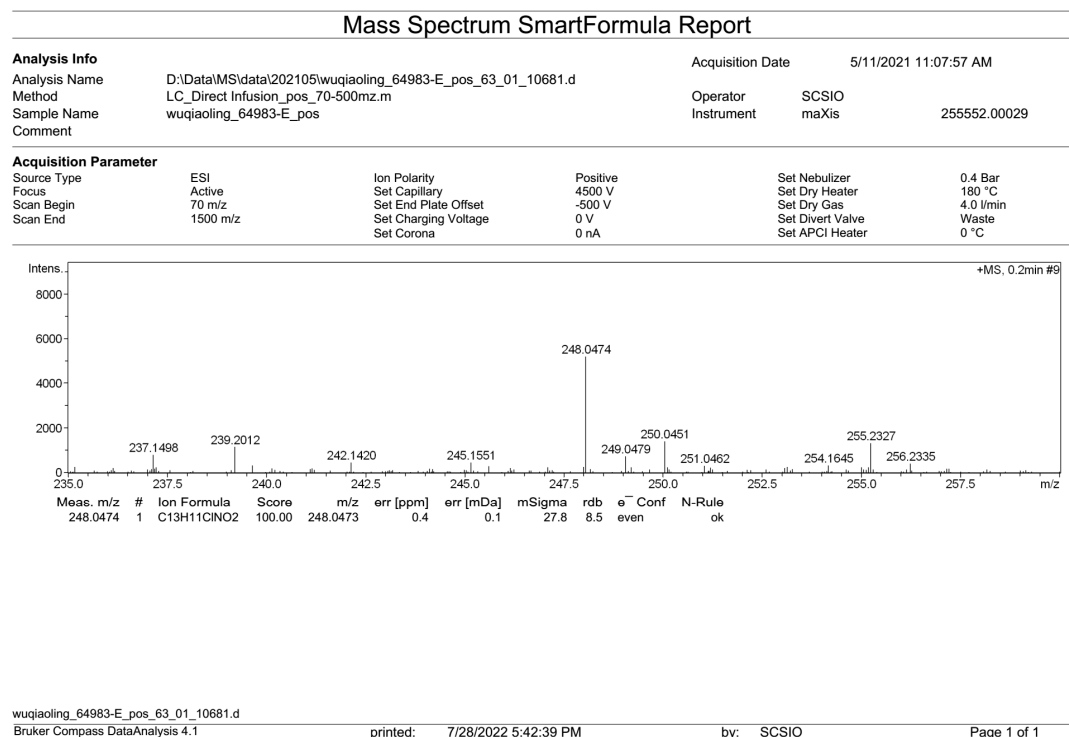

**Figure S61.** HRESIMS of compound 7.

## 2. Medium Formula and Optimization Results of *S. diacarni* SCSIO 64983

In this experiment, 14 kinds of culture media were used for fermentation optimization. The specific medium formula is as follows:

N4: Starch 15 g/L, fish peptone 8 g/L, bacteriological peptone 5 g/L, glycerol 8 g/L, KBr 0.2 g/L, sea salt 30 g/L, calcium carbonate 2 g/L; pH: 7.2-7.4.

M11: Glycerol 30 g/L, Soybean powder 10 g/L, CaCO<sub>3</sub> 2 g/L, sea salt 30 g/L; pH: 7.2-7.4.

SCAS: Starch 40 g/L, Acid Hydrolyzed Casein Peptone 5 g/L, KH<sub>2</sub>PO<sub>4</sub> 0.5 g/L, MgSO<sub>4</sub>·7H<sub>2</sub>O 0.5 g/L, FeSO<sub>4</sub>·7H<sub>2</sub>O 0.5 g/L; pH: 7.2-7.4.

HMT: Glycerol 20 g/L, fish powder 20 g/L, Yeast extract 5 g/L, CaCO<sub>3</sub> 5 g/L; pH: 7.2-7.4.

ISP2: Glucose 4 g/L, Yeast extract 4 g/L, Malt extract 10 g/L, sea salt 30 g/L; pH: 7.2-7.4.

ISP3: Oatmeal 20 g/L, Trace elements 1mL/L, FeSO<sub>4</sub>·7H<sub>2</sub>O 0.1 g/L, MnCl<sub>2</sub>·4H<sub>2</sub>O:0.1 g/L, ZnSO<sub>4</sub>·7H<sub>2</sub>O 0.1 g/L; pH: 7.2-7.4.

ISP4: Starch 10 g/L, Bacteriological Peptone 1 g/L, Yeast extract 5 g/L, KH<sub>2</sub>PO<sub>4</sub> 1 g/L, MgSO<sub>4</sub>·7H<sub>2</sub>O 1 g/L, NaCl 1 g/L, (NH<sub>4</sub>)<sub>2</sub>SO<sub>4</sub> 2 g/L, sea salt 30 g/L, CaCO<sub>3</sub> 2 g/L, Trace elements 1mL/L; pH: 7.2-7.4.

AM2ab: Starch 15 g/L, Soybean powder 5 g/L, sea salt 30 g/L, Glucose 20 g/L, MgSO<sub>4</sub>·7H<sub>2</sub>O 0.5 g/L, CaCO<sub>3</sub> 2 g/L, Yeast extract 2 g/L, KH<sub>2</sub>PO<sub>4</sub> 0.5 g/L, Bacteriological Peptone 2 g/L, NaCl 4 g/L; pH: 7.2-7.4.

RA: Glucose 10 g/L, Starch 20 g/L, Malt extract 10 g/L, sea salt 30 g/L, corn powder 5 g/L, maltose 10 g/L, CaCO<sub>3</sub> 2 g/L, Trace elements 100 µL; pH: 7.2-7.4.

AM3: Starch 15 g/L, Soybean powder 10 g/L, glycerol 15 g/L, Bacteriological Peptone 15 g/L, sea salt 30 g/L, CaCO<sub>3</sub> 5 g/L; pH: 7.2-7.4.

LB: TRYPTONE 10g/L, Yeast extract 5g/L, NaCl 10g/L; pH: 7.2-7.4.

YMS: Yeast extract 4g/L, Malt extract 10g/L, Starch 4 g/L, Oatmeal 8 g/L, sea salt 30 g/L; pH: 7.2-7.4.

MS: Soybean powder 20 g/L, Mannitol 20 g/L; pH: 7.2-7.4.

TSB: TSB finished powder 30 g/L; pH: 7.2-7.4.

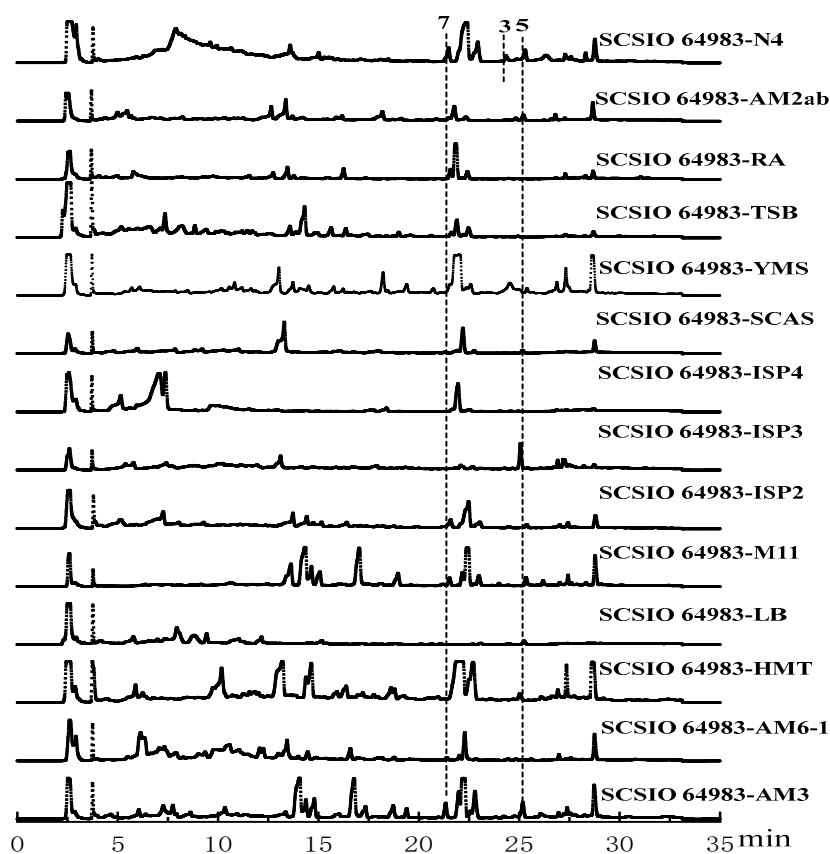

**Figure S62.** Optimization Results of *S. diacarni* SCSIO 64983

### 3. NMR data of **6-7** in methanol- $d_4$ and **1-2** in DMSO- $d_6$

**Table S1.** NMR data of **6–7** in methanol-*d*<sub>4</sub> and **1–2** in DMSO-*d*<sub>6</sub>

| Position | 6 <sup>a</sup>        |                          | 7 <sup>a</sup>        |                          | 1 <sup>c</sup>        |                          | 2 <sup>c</sup>        |                          |
|----------|-----------------------|--------------------------|-----------------------|--------------------------|-----------------------|--------------------------|-----------------------|--------------------------|
|          | δ <sub>C</sub> , type | δ <sub>H</sub> (J in Hz) | δ <sub>C</sub> , type | δ <sub>H</sub> (J in Hz) | δ <sub>C</sub> , type | δ <sub>H</sub> (J in Hz) | δ <sub>C</sub> , type | δ <sub>H</sub> (J in Hz) |
| 1        | 110.5, CH             | 7.38, d (8.7)            | 110.1, CH             | 7.29, d (8.7)            | 111.0, CH             | 7.49, d (8.1)            | 110.1, CH             | 7.42, d (8.7)            |
| 2        | 113.9, CH             | 7.19, d (8.7)            | 114.1, CH             | 7.17, d (8.7)            | 125.6, CH             | 7.40, m                  | 113.5, CH             | 7.32, d (8.7)            |
| 3        | 149.9, C              | -                        | 149.5, C              | -                        | 118.5, CH             | 7.18, t (7.5)            | 148.6, C              | -                        |
| 4        | 117.6, C              | -                        | 117.6, C              | -                        | 122.0, CH             | 8.28, d (7.9)            | 113.6, C              | -                        |
| 4a       | 123.0, C              | -                        | 122.0, C              | -                        | 121.9, C              | -                        | 120.3, C              | -                        |
| 4b       | 124.8, C              | -                        | 123.8, C              | -                        | 118.8, C              | -                        | 118.5, C              | -                        |
| 5        | 115.2, CH             | 8.00, dd<br>(0.7,8.0)    | 108.6, CH             | 7.95, d (2.4)            | 112.6, C              | -                        | 115.1, C              | -                        |
| 6        | 120.1, CH             | 6.97, t (7.8)            | 150.9, C              | -                        | 129.9, C              | -                        | 130.1, C              | -                        |
| 7        | 111.4, CH             | 6.84, dd<br>(0.7,7.6)    | 116.6, CH             | 6.95, dd<br>(2.4,8.6)    | 115.9, CH             | 7.08, d (8.5)            | 118.1, CH             | 7.16, d (8.5)            |
| 8        | 144.2, C              | -                        | 112.0, CH             | 7.27, d (8.6)            | 109.2, CH             | 7.33, d (8.5)            | 109.7, CH             | 7.34, d (8.5)            |
| 8a       | 132.5, C              | -                        | 136.9, C              | -                        | 135.9, C              | -                        | 137.6, C              | -                        |
| 9a       | 137.5, C              | -                        | 138.3, C              | -                        | 140.2, C              | -                        | 136.5, C              | -                        |
| 1''      | -                     | -                        | -                     | -                        | 164.3, C              | -                        | 165.8, C              | -                        |
| 2''      | -                     | -                        | -                     | -                        | 29.0, CH <sub>2</sub> | 3.59, s                  | 30.4, CH <sub>2</sub> | 3.30, s                  |
| 3-OMe    | 58.6, CH <sub>3</sub> | 3.93, s                  | 58.6, CH <sub>3</sub> | 3.92, s                  | -                     | -                        | 57.6, CH <sub>3</sub> | 3.87, s                  |
| 6-OMe    | -                     | -                        | -                     | -                        | -                     | -                        | -                     | -                        |
| 9-NH     | -                     | -                        | -                     | -                        | -                     | 11.37                    | -                     | 11.59                    |
| 10-NH    | -                     | -                        | -                     | -                        | -                     | 10.52                    | -                     | 10.37                    |

<sup>a</sup> The data were recorded in methanol-*d*<sub>4</sub>; <sup>b</sup> The data were recorded in chloroform-*d*<sub>3</sub>; <sup>c</sup> The data were recorded in DMSO-*d*<sub>6</sub>.
